# Supplementary material for: Integrated transcriptome and metabolome profiling of Camellia reticulata reveal mechanisms of flower color differentiation
Source: Front Genet. 2022 Nov 22;13:1059717. doi: 10.3389/fgene.2022.1059717 (PMC9725097; doi:10.3389/fgene.2022.1059717)
Supplement: Supplementary file 7 [file Table4.xlsx]

## Sheet: Sheet1
Supplementary Table 4: Average ion intensity of metabolites detected in the petals of flowers of three contrasting Camellia reticulata, C. reticulata ‘Yunnan Camellia’ (HHYC), C. reticulata ‘Tongzimian’ (TZM), and C. reticulata ‘Xuejiao’ (XJ). Profiling were done in triplicates of petals from each cultivar.
Index	Compounds	Class I	Class II	Index	HHYC	XJ	TZM	cpd_ID	kegg_map
mws1731	Chalcone	Flavonoids	Chalcones	mws1731	8915.43	10293.6	9882.53	C01484	--
MWSHY0202	6-Methylflavone	Flavonoids	Flavonoid	MWSHY0202	5494.33	2872.3	3242.53	--	--
pme3137	3-Hydroxyflavone	Flavonoids	Flavonols	pme3137	2817.67	2042.9	2495.43	C20871	--
MWSHY0053	3,7,4'-Trihydroxyflavone	Flavonoids	Flavonoid	MWSHY0053	55116.7	89637.7	76797.7	--	--
MWSHY0023	Baicalein	Flavonoids	Flavonoid	MWSHY0023	129776	192300	158893	C10023	--
Lmmp005125	Pinostrobin Chalcone	Flavonoids	Chalcones	Lmmp005125	6173.07	8978.77	6530.97	--	--
Hmlp006030	4,4'-dihydroxy-2-methoxychalcone	Flavonoids	Chalcones	Hmlp006030	45461	65123.7	68723.7	--	--
Hmlp005803	4,4'-dihydroxy-2'-methoxychalcone	Flavonoids	Chalcones	Hmlp005803	211953	287990	294053	--	--
pme2960	Naringenin chalcone*	Flavonoids	Chalcones	pme2960	524910	127873	96355.3	C06561	ko00941,ko01100,ko01110
MWSHY0137	Naringenin (5,7,4'-Trihydroxyflavanone)	Flavonoids	Dihydroflavone	MWSHY0137	59180	29255.3	19741.3	C00509	ko00941,ko00943,ko01100,ko01110
mws0914	Pinobanksin*	Flavonoids	Dihydroflavonol	mws0914	325727	83291	65419.3	C09826	ko00941
pme3475	Butin	Flavonoids	Dihydroflavone	pme3475	77485.3	32848	28367.7	C09614	ko00941
MWSHY0017	(±)-Naringenin; 4',5,7-Trihydroxyflavanone	Flavonoids	Dihydroflavone	MWSHY0017	519800	120273	92963.7	--	--
pme3285	Afzelechin (3,5,7,4'-Tetrahydroxyflavan)	Flavonoids	Flavanols	pme3285	19221.7	39553.7	19287.3	C09320	ko00941,ko01110
pme1201	Phloretin	Flavonoids	Chalcones	pme1201	11960	11882.5	8157.13	C00774	ko00941,ko01110
Lmgp004784	Apiferol	Flavonoids	Flavonoid	Lmgp004784	85662.7	125261	24309.3	--	--
mws1422	Epiafzelechin	Flavonoids	Flavanols	mws1422	465200	411233	435847	C12128	ko00941,ko01110
MWSHY0051	Kaempferol (3,5,7,4'-Tetrahydroxyflavone)	Flavonoids	Flavonols	MWSHY0051	118946	244257	211390	C05903	ko00941,ko00944,ko01100,ko01110
mws1094	Aromadendrin (Dihydrokaempferol)	Flavonoids	Dihydroflavonol	mws1094	152280	76144.3	24151	C00974	ko00941,ko01100,ko01110
Lmgp004167	3',4,4',5,7-Pentahydroxyflavan (Luteoforol)	Flavonoids	Flavanols	Lmgp004167	981163	1.40246e+06	3032800	C05907	ko00941
Lmsp004851	3-Hydroxyphloretin	Flavonoids	Chalcones	Lmsp004851	125028	97319.7	153220	--	--
MWSHY0167	Catechin	Flavonoids	Flavanols	MWSHY0167	6.52927e+06	5055900	6.21237e+06	C06562	ko00941,ko01110
MWSHY0174	Epicatechin	Flavonoids	Flavanols	MWSHY0174	7.02203e+07	7.02077e+07	8.53607e+07	C09727	ko00941,ko01100,ko01110
Zmhp003514	6,7,8-Tetrahydroxy-5-methoxyflavone	Flavonoids	Flavonoid	Zmhp003514	5831.13	4088.67	1023.87	--	--
MWSHY0069	Hispidulin (5,7,4'-Trihydroxy-6-methoxyflavone)	Flavonoids	Flavonoid	MWSHY0069	3763.87	18846.7	7021.8	C10058	--
Lmjp004941	Rhamnocitrin (7-Methylkaempferol)	Flavonoids	Flavonols	Lmjp004941	7961.1	18239	5531.4	C17059	--
pmc1990	4'-Hydroxy-5,7-dimethoxyflavanone	Flavonoids	Dihydroflavone	pmc1990	2.36877e+07	2.06497e+07	23002000	--	--
Zmmp009258	Naringenin-4',7-dimethyl ether	Flavonoids	Dihydroflavone	Zmmp009258	858.347	2646.87	3112.43	--	--
MWSHY0029	Quercetin	Flavonoids	Flavonols	MWSHY0029	57480.3	90752	48506	C00389	ko00941,ko00944,ko01100,ko01110
mws0920	Tricetin (5,7,3',4',5'-Pentahydroxyflavone)	Flavonoids	Flavonoid	mws0920	22001.7	66287.7	97792	C10192	ko00941
Cmsp004086	Dihydrokaempferide	Flavonoids	Dihydroflavonol	Cmsp004086	1.82187e+06	3852300	4.08643e+06	--	--
mws1033	Homoeriodictyol	Flavonoids	Dihydroflavone	mws1033	10402.9	28406.3	28043.7	C09756	ko00941
MWSHY0066	Taxifolin	Flavonoids	Dihydroflavonol	MWSHY0066	2378100	3295400	3746700	C01617	ko00941,ko01100,ko01110
Lmmp003109	3'-O-Methyl-(-)-epicatechin	Flavonoids	Flavanols	Lmmp003109	94604	203853	245967	--	--
mws0049	Gallocatechin	Flavonoids	Flavanols	mws0049	659540	12690.3	46678.3	C12127	ko00941,ko01110
MWSHY0098	Epigallocatechin	Flavonoids	Flavanols	MWSHY0098	1.86693e+06	11663.7	148013	C12136	ko00941,ko01110
Lmdp003808	Azaleatin (5-O-Methylquercetin)	Flavonoids	Flavonols	Lmdp003808	32367.3	12523.3	93091	C10022	--
mws0855	Gossypetin(3,3',4',5,7,8-Hexahydroxyflavone)	Flavonoids	Flavonols	mws0855	7703.73	7929.3	1804.17	C04109	--
Zmjp008503	5-Hydroxy-4',6,7-trimethoxyflavone (Salvigenin)	Flavonoids	Flavonoid	Zmjp008503	2892.4	4020.43	1976.63	--	--
Lmjp007790	5-Hydroxy-3,7,4'-trimethoxyflavone	Flavonoids	Flavonoid	Lmjp007790	2741.57	1699.77	1421.33	--	--
Lmzp004885	Tricin (5,7,4'-Trihydroxy-3',5'-dimethoxyflavone)	Flavonoids	Flavonoid	Lmzp004885	2956.73	1582.13	2533.83	C10193	--
Lmsp009872	5,7,3',4'-Tetramethoxyflavone	Flavonoids	Flavonoid	Lmsp009872	2056.33	2048.47	1909.53	--	--
MWSHY0118	Scutellarein tetramethyl ether	Flavonoids	Flavonoid	MWSHY0118	5335.73	5072.13	4206.57	C14472	--
MWSHY0128	5,7,8,4'-Tetramethoxyflavone	Flavonoids	Flavonoid	MWSHY0128	7149.8	4360.67	4522.93	--	--
Zmjp010694	5-Hydroxy-3,7,3',4'-tetramethoxyflavone (Retusin)	Flavonoids	Flavonoid	Zmjp010694	1218.91	1655.07	920.333	--	--
Zmjp009119	5,4'-Dihydroxy-3,6,7,3'-tetramethoxyflavone	Flavonoids	Flavonoid	Zmjp009119	5949.2	5522.77	4680.87	--	--
MWSHY0101	5-Hydroxy-6,7,8,3',4'-pentamethoxyflavone	Flavonoids	Flavonoid	MWSHY0101	4724.03	7853.73	6539.97	--	--
pmb0580	Chrysin-5-O-glucoside (Toringin)	Flavonoids	Flavonoid	pmb0580	2459	45426.7	15171.9	--	--
HJAP012	Luteolin-8-C-arabinoside	Flavonoids	Flavonoid carbonoside	HJAP012	24932	62050.7	52630.3	--	--
Lmbp003668	Kaempferol-3-O-arabinoside	Flavonoids	Flavonols	Lmbp003668	646227	3209500	1830600	--	--
Lmyp004617	Pinocembrin-7-O-glucoside (Pinocembroside)	Flavonoids	Dihydroflavone	Lmyp004617	12612.8	57447.3	30840	--	--
Smlp002532	Cyanidin-3-O-arabinoside*	Flavonoids	Anthocyanins	Smlp002532	3.00603e+07	15886	9	--	--
Hmhp002834	Cyanidin 3-xyloside*	Flavonoids	Anthocyanins	Hmhp002834	2.79413e+07	24756	9	--	--
mws0072	Apigenin-5-O-glucoside	Flavonoids	Flavonoid	mws0072	757323	9145300	2.72657e+06	--	--
mws1434	Apigenin-6-C-glucoside (Isovitexin)	Flavonoids	Flavonoid carbonoside	mws1434	6905.83	287590	133487	C01714	ko00944
MWSHY0181	Apigenin-8-C-Glucoside (Vitexin)	Flavonoids	Flavonoid carbonoside	MWSHY0181	15694.7	360963	243170	C01460	ko00941,ko00944
MWSHY0189	Apigenin-7-O-glucoside(Cosmosiin)	Flavonoids	Flavonoid	MWSHY0189	1505300	2.11577e+06	1761300	C04608	ko00944
MWS20148	Apigenin-3'-O-α-D-glucopyranoside	Flavonoids	Flavonoid	MWS20148	1.89587e+06	2836700	2251600	--	--
mws0919	Kaempferol-3-O-rhamnoside (Afzelin)(Kaempferin)	Flavonoids	Flavonols	mws0919	1.52133e+06	2.05347e+06	2.85513e+06	C16911	ko00944
pmp000117	3,5,6,7,8,3',4'-Heptamethoxyflavone	Flavonoids	Flavonols	pmp000117	2074.53	1938.7	2282.3	--	--
pme3392	Pelargonidin-3-O-glucoside	Flavonoids	Anthocyanins	pme3392	22014000	9	9	C12137	ko00942,ko01100,ko01110
MWSHY0100	Avicularin(Quercetin-3-O-α-L-arabinofuranoside)	Flavonoids	Flavonols	MWSHY0100	3.88093e+06	6419900	7.42893e+06	--	--
Lmdp003509	Quercetin-3-O-xyloside (Reynoutrin)	Flavonoids	Flavonols	Lmdp003509	43202000	5.94257e+07	63943000	--	--
mws1179	Naringenin-7-O-glucoside (Prunin)	Flavonoids	Dihydroflavone	mws1179	2.03237e+06	2.00093e+06	3.66927e+06	C09099	ko00941
HJN087	Naringenin-4'-O-glucoside	Flavonoids	Dihydroflavone	HJN087	1250890	995953	414763	--	--
Smlp001915	Delphinidin-3-O-arabinoside	Flavonoids	Anthocyanins	Smlp001915	207653	9	9	--	--
HJN055	Dihydrocharcone-4'-O-glucoside	Flavonoids	Chalcones	HJN055	8.32233e+06	5.93217e+06	7.02853e+06	--	--
Lmfn004093	Phloretin-4'-O-glucoside (Trilobatin)	Flavonoids	Chalcones	Lmfn004093	9.55107e+06	1.16122e+07	8.69373e+06	--	--
MWSHY0075	Phlorizin	Flavonoids	Chalcones	MWSHY0075	17039.3	33415.3	23203.3	C01604	ko00941,ko01110
MWSHY0057	Baicalin	Flavonoids	Flavonoid	MWSHY0057	13757	20060.7	25912.7	C10025	--
Hmcp002316	Isorhamnetin-3-O-arabinoside	Flavonoids	Flavonols	Hmcp002316	367930	335413	753267	--	--
MWSHY0132	Quercetin-3-O-rhamnoside(Quercitrin)	Flavonoids	Flavonols	MWSHY0132	2.49877e+07	2.53027e+07	3.47497e+07	C01750	ko00944
pmn001716	Carthamone	Flavonoids	Chalcones	pmn001716	2486200	8.39407e+06	10839000	C08598	--
MWS20147	Luteolin-3'-O-glucoside	Flavonoids	Flavonoid	MWS20147	8.09127e+06	1.2867e+07	19334000	--	--
mws0089	Kaempferol-7-O-glucoside	Flavonoids	Flavonols	mws0089	3.03347e+06	1.37387e+07	1.43237e+07	--	--
Hmpp003270	Luteolin-4'-O-glucoside	Flavonoids	Flavonoid	Hmpp003270	2.12187e+06	4607900	3175400	--	--
MWSHY0016	Luteolin-6-C-glucoside (Isoorientin)	Flavonoids	Flavonoid carbonoside	MWSHY0016	16547.3	29132	39324	C01821	--
mws0913	Kaempferol-3-O-galactoside (Trifolin)	Flavonoids	Flavonols	mws0913	15640000	3.88577e+07	3.29787e+07	C12626	ko00944
MWSHY0104	Luteolin-7-O-glucoside (Cynaroside)	Flavonoids	Flavonoid	MWSHY0104	1558200	4602100	3.10907e+06	C03951	ko00944
Xmyp005654	Kaempferol-4'-O-glucoside	Flavonoids	Flavonols	Xmyp005654	6.52457e+07	4.58883e+07	5.68827e+07	--	--
MWSHY0136	Kaempferol-3-O-glucoside (Astragalin)	Flavonoids	Flavonols	MWSHY0136	1584300	4399400	3.16603e+06	C12249	ko00944,ko01110
pmb0550	Cyanidin-3-O-glucoside (Kuromanin)*	Flavonoids	Anthocyanins	pmb0550	15752000	9	9	C08604	ko00942
pmf0027	Cyanidin-3-O-galactoside*	Flavonoids	Anthocyanins	pmf0027	1.30497e+07	28850	9	C08647	--
pmn001640	Myricetin-3-O-arabinoside	Flavonoids	Flavonols	pmn001640	20878.3	36956	43198	--	--
MWS20145	eriodictyol 7-O-β-D-glucopyranoside	Flavonoids	Dihydroflavone	MWS20145	4757900	1.35983e+07	9.93437e+06	--	--
mws1361	Taxifolin-3-O-rhamnoside (Astilbin)	Flavonoids	Dihydroflavonol	mws1361	2.10267e+07	28569000	3.46893e+07	C17449	--
Lmsn003297	3,4,2',4',6'-Pentahydroxychalcone-4'-O-glucoside	Flavonoids	Chalcones	Lmsn003297	409367	253863	358567	C16408	ko00941
Lmsp004301	3',5,5',7-Tetrahydroxyflavanone-7-O-glucoside	Flavonoids	Dihydroflavone	Lmsp004301	3.17353e+06	6508500	2.50277e+06	--	--
HJN086	Eriodictyol-3'-O-glucoside	Flavonoids	Dihydroflavone	HJN086	393987	578227	422273	--	--
pmb3023	Eriodictyol-8-C-glucoside	Flavonoids	Dihydroflavone	pmb3023	1.10613e+06	2814200	1834400	--	--
Lmtn002796	Aromadendrin-7-O-glucoside	Flavonoids	Dihydroflavonol	Lmtn002796	2.91113e+06	5.85817e+06	3.14393e+06	--	--
mws0057	Eriodictyol-7-O-glucoside	Flavonoids	Dihydroflavone	mws0057	318477	504590	677123	--	--
pmn001415	Catechin-(7,8-bc)-4β-(3,4-dihydroxyphenyl)-dihydro-2-(3H)-one	Flavonoids	Flavanols	pmn001415	160903	129400	52514	--	--
pmn001416	Catechin-(7,8-bc)-4α-(3,4-dihydroxyphenyl)-dihydro-2-(3H)-one	Flavonoids	Flavanols	pmn001416	1.94173e+06	1145530	376233	--	--
HJN041	Epicatechin glucoside	Flavonoids	Flavanols	HJN041	9.31353e+06	2.05143e+06	2.69317e+06	--	--
Hmpn005101	Sieboldin	Flavonoids	Chalcones	Hmpn005101	353053	219020	264467	--	--
Lmsn004797	3-Hydroxyphloretin-4'-O-glucoside	Flavonoids	Chalcones	Lmsn004797	398507	273950	334307	--	--
pmp000577	Acacetin-7-O-glucuronide	Flavonoids	Flavonoid	pmp000577	4910.73	10288.9	8584.87	--	--
Lmzn001894	Kaempferol-3-O-glucuronide	Flavonoids	Flavonols	Lmzn001894	2247500	8766000	3.20533e+06	--	--
Hmmp004965	Diosmetin-7-O-glucoside*	Flavonoids	Dihydroflavone	Hmmp004965	715053	1731200	610140	--	--
pmb3012	Chrysoeriol-7-O-glucoside	Flavonoids	Flavonoid	pmb3012	76675.7	111615	120800	--	--
Lmpn006208	8-Methoxykaempferol-7-O-rhamnoside	Flavonoids	Flavonols	Lmpn006208	116429	62947.3	311797	--	--
pmb2999	Chrysoeriol-5-O-glucoside	Flavonoids	Flavonoid	pmb2999	1017040	2.46843e+06	3.20267e+06	--	--
Hmcp002539	Isorhamnetin-3-O-rhamnoside	Flavonoids	Flavonols	Hmcp002539	16482.7	16968.7	20018.4	--	--
Lmjp003655	6-C-MethylKaempferol-3-glucoside	Flavonoids	Flavonoid	Lmjp003655	712817	1909500	581417	--	--
pmp000579	Diosmetin-7-O-galactoside*	Flavonoids	Dihydroflavone	pmp000579	718797	1.74117e+06	602287	--	--
MWSslk237	Homoplantaginin	Flavonoids	Other Flavonoids	MWSslk237	692403	1.85453e+06	594673	C17762	--
pmf0203	Peonidin-3-O-glucoside	Flavonoids	Anthocyanins	pmf0203	1.10687e+07	9	9	C12141	ko00942
MWSHY0113	Quercetin-3-O-galactoside (Hyperin)	Flavonoids	Flavonols	MWSHY0113	9364100	1.74927e+07	1.92997e+07	C10073	--
mws0856	Quercetin-4'-O-glucoside (Spiraeoside)	Flavonoids	Flavonols	mws0856	9.59007e+06	1.51597e+07	1.63647e+07	--	--
Hmcn001884	6-Hydroxyluteolin 5-glucoside	Flavonoids	Flavonoid	Hmcn001884	1.12003e+07	1.54553e+07	16758000	--	--
mws0056	Myricetin-3-O-rhamnoside (Myricitrin)	Flavonoids	Flavonols	mws0056	210133	8377.17	54066.3	C10108	--
mws1329	Quercetin-7-O-glucoside	Flavonoids	Flavonols	mws1329	8937400	13613000	14170000	C12639	--
Lmdp003286	Isohyperoside	Flavonoids	Flavonols	Lmdp003286	9.49357e+06	16426000	18676000	--	--
MWSHY0046	Isoquercitrin	Flavonoids	Flavonoid	MWSHY0046	9083800	1.57297e+07	17709000	--	--
Lmzp002365	Hesperetin-7-O-glucoside	Flavonoids	Dihydroflavone	Lmzp002365	566960	747860	2.02057e+06	C16422	ko00941
pme1598	Hesperetin-5-O-glucoside	Flavonoids	Dihydroflavone	pme1598	1.02655e+07	16679000	18038000	--	--
pme1398	Delphinidin-3-O-glucoside (Mirtillin)*	Flavonoids	Anthocyanins	pme1398	1.82577e+07	9	145603	C12138	ko00942
Lmcp001821	Delphinidin-3-O-galactoside*	Flavonoids	Anthocyanins	Lmcp001821	18885000	9	158770	--	--
Xmsn002700	Taxifolin-3'-O-glucoside	Flavonoids	Dihydroflavonol	Xmsn002700	1092100	2.03057e+06	1.94897e+06	--	--
Lmqp006281	Kaempferol-3-O-(4''-O-acetyl)rhamnoside	Flavonoids	Flavonols	Lmqp006281	58437	130590	38353	--	--
Lmmp003783	Quercetin-3-O-glucuronide	Flavonoids	Flavonols	Lmmp003783	38546	49344.7	135410	--	--
Hmjp003123	Quercetin-5-O-glucuronide	Flavonoids	Flavonols	Hmjp003123	1.16237e+07	1.99637e+07	1.27763e+07	--	--
Lmfn003760	Quercetin-4'-O-glucuronide	Flavonoids	Flavonols	Lmfn003760	9412800	16695000	1.19974e+07	--	--
pma0214	6-C-Methylquercetin-3-O-glucoside	Flavonoids	Flavonols	pma0214	19047	73968.1	237146	--	--
pma6640	3'-O-Methyltricetin-7-O-glucoside	Flavonoids	Flavonoid	pma6640	52761.7	99297.3	372617	--	--
Lmjp003295	6-Methoxykaempferol-3-O-glucoside	Flavonoids	Flavonols	Lmjp003295	40944	86832.3	289173	--	--
Lmjp003044	Isorhamnetin-3-O-Glucoside*	Flavonoids	Flavonols	Lmjp003044	1557000	1.27559e+06	2.43127e+06	--	--
pma0249	3'-O-Methyltricetin-5-O-glucoside	Flavonoids	Flavonoid	pma0249	11600.9	14161.5	53641.3	--	--
Hmcp002207	Isorhamnetin-7-O-glucoside (Brassicin)*	Flavonoids	Flavonols	Hmcp002207	1.73477e+06	1.27549e+06	2350900	--	--
Hmgp002148	Nepetin-7-O-alloside*	Flavonoids	Flavonoid	Hmgp002148	1664900	1316940	2490600	--	--
Hmgp002036	Nepetin-7-O-glucoside	Flavonoids	Flavonoid	Hmgp002036	1.74637e+06	1.31004e+06	2529400	--	--
Lmmp001947	Gossypetin-3-O-glucoside	Flavonoids	Flavonols	Lmmp001947	291213	20743.7	158603	--	--
Lmmp003271	Gossypetin-8-O-glucoside	Flavonoids	Flavonols	Lmmp003271	37011.3	32177.3	73892.7	C10051	--
Lmpp003465	Myricetin-3-O-glucoside	Flavonoids	Flavonols	Lmpp003465	326560	9678.33	144187	--	--
Lmfp003403	Quercetagetin-7-O-glucoside	Flavonoids	Flavonols	Lmfp003403	301260	35656.7	178786	--	--
pmb2987	Acacetin-7-O-(6''-O-acetyl)glucoside	Flavonoids	Flavonoid	pmb2987	74736.7	786587	148344	--	--
Lmmn003398	Kaempferol-3-O-(6''-acetyl)glucoside	Flavonoids	Flavonols	Lmmn003398	825167	2.21403e+06	9956700	--	--
Lmmp003903	Kaempferol-3-O-(2''-acetyl)glucoside	Flavonoids	Flavonols	Lmmp003903	30274.3	74071	43280	--	--
Lmhp206353	Tricin-4'-O-glucoside	Flavonoids	Flavonoid	Lmhp206353	15434.3	12931.3	12092	--	--
pmb0736	Tricin-7-O-Glucoside	Flavonoids	Flavonoid	pmb0736	12277.8	7965.83	10739.5	--	--
pmb3000	Chrysoeriol-7-O-(6''-acetyl)glucoside	Flavonoids	Flavonoid	pmb3000	291677	510707	208923	--	--
pmb3045	Tricin-7-O-Glucuronide	Flavonoids	Flavonoid	pmb3045	20836	5174.63	17900.3	--	--
Hmln002199	Quercetin-3-O-(6''-acetyl)galactoside	Flavonoids	Flavonols	Hmln002199	102133	243957	1168260	--	--
Li512111	Isorhamnetin-3-O-(6''-acetylglucoside)	Flavonoids	Flavonols	Li512111	2226.33	10363.4	52176.3	--	--
pma0791	Naringenin-7-O-(6''-malonyl)glucoside	Flavonoids	Dihydroflavone	pma0791	12864.5	17500.7	14572.3	--	--
pmb3041	Tricin-7-O-saccharic acid	Flavonoids	Flavonoid	pmb3041	4599400	1.24245e+06	4.16803e+06	--	--
Lmmp003817	Kaempferol-3-O-(6''-malonyl)glucoside*	Flavonoids	Flavonols	Lmmp003817	2.87147e+06	6.75203e+06	2.12113e+07	--	--
Lmdp004892	Kaempferol-3-O-(6''-malonyl)galactoside*	Flavonoids	Flavonols	Lmdp004892	2522000	6711100	2.19367e+07	--	--
pmp000587	Luteolin-7-O-(6''-malonyl)glucoside	Flavonoids	Flavonoid	pmp000587	2835	4053.07	17681.7	C10103	--
pmb0542	Cyanidin-3-O-(6''-O-malonyl)glucoside	Flavonoids	Anthocyanins	pmb0542	360783	9	9	C12643	ko00942
pmb0686	Eriodictyol-7-O-(6''-malonyl)glucoside	Flavonoids	Dihydroflavone	pmb0686	2564.77	10697.4	24929.7	--	--
Hmln002189	Quercetin-3-O-(6''-malonyl)galactoside	Flavonoids	Flavonols	Hmln002189	206290	591103	2.42163e+06	--	--
pmp000589	Quercetin-7-O-(6''-malonyl)glucoside	Flavonoids	Flavonols	pmp000589	258763	637083	3.38237e+06	--	--
pmb2979	Hesperetin-7-O-(6''-malonyl)glucoside	Flavonoids	Dihydroflavone	pmb2979	212510	152877	104388	--	--
HJN078	Pinocembrin-7-O-(2''-O-arabinosyl)glucoside	Flavonoids	Dihydroflavone	HJN078	17201.3	110019	3753.2	--	--
Lmsn006452	Phloretin-4'-O-(6''-Salicyloyl)glucoside	Flavonoids	Chalcones	Lmsn006452	6848.33	5278	4030	--	--
pmb3114	Epicatechin-epiafzelechin	Flavonoids	Flavanols	pmb3114	1060110	3.09547e+06	1993100	--	--
HJAP064	Isorhamnetin-3-O-(6''-malonylglucoside)*	Flavonoids	Flavonols	HJAP064	8823.73	21407.7	69596	--	--
Zmhp005139	Tamarixetin-3-O-(6''-malonyl)glucoside	Flavonoids	Flavonols	Zmhp005139	7626.67	15913.7	67456	--	--
pma0760	3'-O-Methyltricetin-7-O-(6''-malonyl)glucoside*	Flavonoids	Flavonoid	pma0760	13406.3	17049.6	59675	--	--
mws1292	Isoschaftoside	Flavonoids	Flavonoid carbonoside	mws1292	38725	139040	50437.3	--	--
Hmcp001858	Kaempferol-3-O-arabinoside-7-O-rhamnoside	Flavonoids	Flavonols	Hmcp001858	421163	829993	2067700	--	--
Zmjp003463	"Vitexin-2""-O-xyloside"	Flavonoids	Flavonoid carbonoside	Zmjp003463	81966.7	189163	384863	--	--
Lmnp102580	Apigenin-6-C-(2''-xylosyl)glucoside	Flavonoids	Flavonoid carbonoside	Lmnp102580	73690	177357	375263	--	--
Smhp004476	Isovitexin-2''xyloside	Flavonoids	Flavonoid carbonoside	Smhp004476	3056.33	13143.3	27142	--	--
Lmtp002474	Apigenin-6-C-(2''-glucosyl)arabinoside	Flavonoids	Flavonoid carbonoside	Lmtp002474	59224.7	213847	73968.3	--	--
Lmtp002642	Apigenin-8-C-(2''-glucosyl)arabinoside	Flavonoids	Flavonoid carbonoside	Lmtp002642	37828.3	81542.3	37317.7	--	--
Lmmp003306	Quercetin-3-O-xylosyl(1→2)arabinoside	Flavonoids	Flavonols	Lmmp003306	7228.23	779817	333733	--	--
Lmsn007789	Phloretin-4'-O-(6''-Cinnamoyl)glucoside	Flavonoids	Chalcones	Lmsn007789	16279.7	3071.37	9221.27	--	--
Zmpn004068	Phloretin-2'-O-(6''-O-xylosyl)glucoside	Flavonoids	Chalcones	Zmpn004068	5810900	2.01313e+06	2021900	--	--
pmp000237	Apigenin-6-C-(2''-glucuronyl)xyloside	Flavonoids	Flavonoid carbonoside	pmp000237	1.96303e+06	1.63353e+06	2.17637e+06	--	--
Lmmp006709	Kaempferol-3-O-(4''-p-coumaroyl)rhamnoside	Flavonoids	Flavonols	Lmmp006709	103937	201290	128220	--	--
Lmpp003930	Apigenin-7-O-(6''-p-Coumaryl)glucoside	Flavonoids	Flavonoid	Lmpp003930	2.93843e+06	748340	534230	--	--
pme0368	Apigenin-7-O-rutinoside (Isorhoifolin)	Flavonoids	Flavonoid	pme0368	4.06127e+06	4.06827e+06	5.87513e+06	--	--
Lmyp004081	Isovitexin-2''-O-rhamnoside	Flavonoids	Flavonoid carbonoside	Lmyp004081	429660	445463	658040	--	--
pme3227	Vitexin-2''-O-rhamnoside	Flavonoids	Flavonoid carbonoside	pme3227	67623	1.85577e+06	1.33283e+06	C12628	ko00944
Lmyp004963	Apigenin-6-C-(2''-rhamnosyl)glucoside	Flavonoids	Flavonoid carbonoside	Lmyp004963	56329	121473	215113	--	--
MWSHY0201	Kaempferol-3,7-O-dirhamnoside (Kaempferitrin)	Flavonoids	Flavonols	MWSHY0201	7.59713e+06	7615300	1.07514e+07	C16981	--
MWSmce498	Rhoifolin	Flavonoids	Flavonoid carbonoside	MWSmce498	2.67813e+06	323730	334467	C12627	ko00944
Lmcn003163	Epitheaflavic acid-3-O-Gallate	Flavonoids	Flavanols	Lmcn003163	2.93553e+06	2.66067e+06	3895000	--	--
Hmcp001769	Quercetin-3-O-rhamnosyl(1→2)arabinoside	Flavonoids	Flavonols	Hmcp001769	135584	236883	741093	--	--
Lmsn006753	Phloretin-4'-O-(6''-p-Coumaroyl)glucoside	Flavonoids	Chalcones	Lmsn006753	170777	118208	93732.3	--	--
Lmfp005436	Quercetin-3-O-(2''-Galloyl)Arabinoside	Flavonoids	Flavonols	Lmfp005436	11125	14690.7	6054.37	--	--
Lmsn006093	Phloretin-2'-O-(2''-Galloyl)glucoside	Flavonoids	Chalcones	Lmsn006093	6158.87	7119.73	4358.63	--	--
Lmmp003672	8,8'-Methylenebiscatechin	Flavonoids	Flavanols	Lmmp003672	197783	87281.3	227300	--	--
pmp001288	Acacetin-7-O-rutinoside (Linarin)	Flavonoids	Flavonoid	pmp001288	17050.3	9998.9	20547.3	--	--
MWSHY0161	Kaempferol-3-O-(6''-p-Coumaroyl)glucoside (Tiliroside)	Flavonoids	Flavonols	MWSHY0161	787760	1.07427e+06	106479	C17140	--
Lmyp004407	Kaempferol-3-O-(2''-p-Coumaroyl)galactoside	Flavonoids	Flavonols	Lmyp004407	911493	1095590	119426	--	--
Lmyp004318	Kaempferol-3-O-(6''-p-Coumaroyl)galactoside	Flavonoids	Flavonols	Lmyp004318	804630	1.06686e+06	113848	--	--
Hmjn004446	Luteolin-7-O-(6''-caffeoyl)rhamnoside	Flavonoids	Flavonoid	Hmjn004446	1.81221e+06	1.28458e+06	271507	--	--
Smlp011494	Amentoflavone-4',4''',7,7''-tetramethyl ether	Flavonoids	Flavonoid	Smlp011494	58038.3	56948.7	61562.7	--	--
Zmjp003291	"Vitexin-2""-O-galactoside"	Flavonoids	Flavonoid carbonoside	Zmjp003291	38848.7	93149.7	99034.7	--	--
MWSHY0080	Luteolin-7-O-neohesperidoside (Lonicerin)	Flavonoids	Flavonoid	MWSHY0080	4.02253e+06	1484200	3.55017e+06	C12630	ko00944
pmp000593	Luteolin-7-O-rutinoside*	Flavonoids	Flavonoid	pmp000593	23600000	10491500	26543000	--	--
MWSHY0061	Kaempferol-3-O-neohesperidoside	Flavonoids	Flavonols	MWSHY0061	3.45023e+06	1.44983e+06	3.15043e+06	--	--
MWSHY0050	Kaempferol-3-O-rutinoside(Nicotiflorin)	Flavonoids	Flavonols	MWSHY0050	3.04733e+06	1201400	2.94907e+06	C21833	ko00944,ko01110
Hmcp001829	Quercetin-3,7-Di-O-rhamnoside	Flavonoids	Flavonols	Hmcp001829	41569.7	74158.3	278073	--	--
Lmlp002990	Isosaponarin(Isovitexin-4'-O-glucoside)	Flavonoids	Flavonoid carbonoside	Lmlp002990	3948.6	20582.6	16086.3	--	--
MWSslk146	4'-O-Glucosylvitexin	Flavonoids	Flavonoid carbonoside	MWSslk146	213850	370487	607150	--	--
mws1073	Apigenin-6,8-di-C-glucoside (Vicenin-2)	Flavonoids	Flavonoid carbonoside	mws1073	13677	63879.7	287293	C10195	--
pme1773	Cyanidin-3-O-rutinoside (Keracyanin)	Flavonoids	Anthocyanins	pme1773	2957200	9	9	C08620	ko00942
Lmjp002596	Quercetin-3-O-sambubioside*	Flavonoids	Flavonols	Lmjp002596	205587	4788600	2423000	C12637	ko00944
Lmln001951	Quercetin-3-O-(6''-O-arabinosyl)glucoside	Flavonoids	Flavonols	Lmln001951	16879.7	971383	136665	--	--
Lmyn005006	"Eriodictyol-7-O-(6""-O-p-coumaroyl)glucoside"	Flavonoids	Dihydroflavone	Lmyn005006	7856.83	10414.6	23234.3	--	--
MWSHY0092	Eriodictyol-7-O-Rutinoside (Eriocitrin)	Flavonoids	Dihydroflavone	MWSHY0092	13007000	283980	103337	C09732	--
Lmsn006267	Phloretin-4'-O-(6''-Caffeoyl)glucoside	Flavonoids	Chalcones	Lmsn006267	351277	300673	261463	--	--
Lmyp003500	Kaempferol-3-O-(2''-galloyl)galactoside	Flavonoids	Flavonols	Lmyp003500	17264.7	22098	39791.3	--	--
Hmgp002121	Hispidulin-7-O-(6''-O-p-Coumaroyl)Glucoside	Flavonoids	Flavonoid	Hmgp002121	6162.27	18496.3	14336.7	--	--
Lmpp003929	Peonidin-3-O-(6''-O-p-coumaroyl)glucoside	Flavonoids	Anthocyanins	Lmpp003929	1.27593e+06	29947.7	19104.7	--	--
Lmdp004267	Quercetin-3-O-(6''-p-Coumaroyl)glucoside	Flavonoids	Flavonols	Lmdp004267	22900.3	132606	19372.7	--	--
Lmyp004052	Quercetin-3-O-(6''-p-Coumaroyl)galactoside	Flavonoids	Flavonols	Lmyp004052	9968.67	130113	27065.3	--	--
pmb0665	Orientin-7-O-glucoside	Flavonoids	Flavonoid carbonoside	pmb0665	515390	515040	1772000	--	--
Lmbp002592	Kaempferol-3,7-di-O-glucoside	Flavonoids	Flavonols	Lmbp002592	5.01683e+07	138547	1.55383e+06	--	--
Lmjp002461	Quercetin-3-O-neohesperidoside	Flavonoids	Flavonols	Lmjp002461	20893000	16715000	4.60807e+07	--	--
Lmmp003091	Quercetin-3-O-(4''-O-glucosyl)rhamnoside	Flavonoids	Flavonols	Lmmp003091	2.02343e+07	14876000	3.52313e+07	C17563	--
Hmpp002612	Luteolin-7-O-gentiobioside	Flavonoids	Flavonoid	Hmpp002612	6.19657e+07	9	1657300	--	--
Zmxp003107	Luteolin-7,3'-di-O-glucoside	Flavonoids	Flavonoid	Zmxp003107	573357	569983	1.75487e+06	--	--
pmb0711	Quercetin-7-O-rutinoside	Flavonoids	Flavonols	pmb0711	1.98053e+07	1.59593e+07	41267000	--	--
MWSHY0067	Quercetin-3-O-rutinoside (Rutin)	Flavonoids	Flavonols	MWSHY0067	19281000	14653000	4.48443e+07	C05625	ko00944,ko01100,ko01110
Xmyp005599	Kaempferol-3-O-galactoside-4'-O-glucoside	Flavonoids	Flavonols	Xmyp005599	207880	183407	65809.3	--	--
Zmjp003031	Orientin-2''-O-galactoside	Flavonoids	Flavonoid carbonoside	Zmjp003031	3990800	268493	157310	--	--
MWSHY0019	Hesperetin-7-O-neohesperidoside(Neohesperidin)	Flavonoids	Dihydroflavone	MWSHY0019	21366	466987	33096.3	C09806	ko00941
pme1777	Cyanidin-3,5-O-diglucoside (Cyanin)	Flavonoids	Anthocyanins	pme1777	3.00243e+07	36218.3	111577	C08639	ko00942
Lmsn006905	Phloretin-4'-O-(6''-Feruloyl)glucoside	Flavonoids	Chalcones	Lmsn006905	136073	31300.3	82453.7	--	--
MWSHY0142	Quercetin-3-O-(2''-galloyl)galactoside	Flavonoids	Flavonols	MWSHY0142	11993.3	40082	59268.3	--	--
Lmcp003751	"Cyanidin-3-O-(6""-O-acetyl-2""-O-xylosyl)glucoside"	Flavonoids	Anthocyanins	Lmcp003751	6382.27	277067	9	--	--
Lmzn001664	Kaempferol-3-O-glucuronide-7-O-glucoside	Flavonoids	Flavonols	Lmzn001664	139103	223080	665783	--	--
HJN051	Tamarixetin-3-O-rutinoside	Flavonoids	Flavonols	HJN051	45004.3	18582.7	94473	--	--
HJAP120	Rhamnetin-3-O-Rutinoside	Flavonoids	Flavonols	HJAP120	238773	80628.7	549360	--	--
Zmxp002867	Chrysoeriol-5,7-di-O-glucoside	Flavonoids	Flavonoid	Zmxp002867	18774.2	5332.73	26528.7	--	--
Lmsp004721	Tamarixetin-3-O-glucoside-7-O-rhamnoside	Flavonoids	Flavonols	Lmsp004721	284010	138024	780350	--	--
MWSHY0064	Isorhamnetin-3-O-neohespeidoside	Flavonoids	Flavonols	MWSHY0064	254717	116415	499707	--	--
Lmmp002963	6-C-Methylquercetin-3-O-rutinoside	Flavonoids	Flavonols	Lmmp002963	11216.6	36517.3	208575	--	--
MWSHY0135	Isorhamnetin-3-O-rutinoside (Narcissin)	Flavonoids	Flavonols	MWSHY0135	247887	134842	572457	--	--
MWSHY0162	Quercetin-3-O-sophoroside (Baimaside)	Flavonoids	Flavonols	MWSHY0162	239920	273360	901727	C12667	ko00944
pmp001311	6-Hydroxykaempferol-7,6-O-Diglucoside	Flavonoids	Flavonols	pmp001311	184920	531580	854317	--	--
pmp001310	6-Hydroxykaempferol-3,6-O-Diglucoside	Flavonoids	Flavonols	pmp001310	184843	312817	916117	--	--
Hmcp005575	Quercetin-5,4'-di-O-glucoside	Flavonoids	Flavonols	Hmcp005575	145313	277690	53761.3	--	--
mws1045	Myricetin-3-O-rutinoside	Flavonoids	Flavonols	mws1045	3241	12169	186057	--	--
Zmcp002666	Quercetin3,7-diglucoside	Flavonoids	Flavonols	Zmcp002666	85501	437933	666810	--	--
pmb0645	Hesperetin-6-C-glucoside-7-O-glucoside	Flavonoids	Flavonoid carbonoside	pmb0645	51349.7	47533	277353	--	--
pmb0618	Hesperetin-8-C-glucoside-3'-O-glucoside	Flavonoids	Flavonoid carbonoside	pmb0618	66749	191123	309037	--	--
pmf0116	Delphinidin-3,5-di-O-glucoside	Flavonoids	Anthocyanins	pmf0116	4.17113e+06	11328.3	37114.3	C16312	ko00942
Lmgp005868	Chrysoeriol-7-O-(6''-feruloyl)glucoside	Flavonoids	Flavonoid	Lmgp005868	17456.3	7861	2355.8	--	--
Lmsp003252	Isorhamnetin-3-O-sophoroside	Flavonoids	Flavonols	Lmsp003252	19348.8	30850.2	4196.23	--	--
Hmln001836	Kaempferol-3-O-(6''-Acetyl)glucosyl-(1→3)-Galactoside	Flavonoids	Flavonols	Hmln001836	8894.17	73465.7	84217	--	--
pmb0578	Luteolin-7-O-(6''-sinapoyl)glucoside	Flavonoids	Flavonoid	pmb0578	25626.7	12699.7	5325.67	--	--
Hmqp003184	Luteolin-7-O-(6''-malonyl)glucoside-5-O-arabinoside	Flavonoids	Flavonoid	Hmqp003184	16401.3	72159.7	1053910	--	--
Hmlp003185	Luteolin-7-O-(6''-malonyl)glucoside-5-O-rhamnoside	Flavonoids	Flavonoid	Hmlp003185	28650.7	24039.7	32334.3	--	--
Lmjp002491	Cyanidin-3-O-(6''-O-p-coumaroyl-2''-O-xylosyl)glucoside	Flavonoids	Anthocyanins	Lmjp002491	771273	28742000	12310900	--	--
pmb0680	Vitexin-7-O-(6''-p-coumaroyl)glucoside	Flavonoids	Flavonoid carbonoside	pmb0680	54351.3	134103	764227	--	--
Zmhp003322	Isovitexin-2''-O-(6'''-p-coumaroyl)glucoside	Flavonoids	Flavonoid carbonoside	Zmhp003322	136540	31120	53549.7	--	--
Hmmn003584	Luteolin-7-O-rutinoside-5-O-rhamnoside	Flavonoids	Flavonoid	Hmmn003584	4110.7	8873.43	9546.5	--	--
Zmlp003063	Luteolin-7-O-(2''-O-rhamnosyl)rutinoside	Flavonoids	Flavonoid	Zmlp003063	1119510	577160	2.16127e+06	--	--
pmb2991	Apigenin-7-O-glucoside-4'-O-rutinoside	Flavonoids	Flavonoid	pmb2991	18813.7	31990.3	219440	--	--
Lmsp003881	Kaempferol-3-O-rutinoside-7-O-rhamnoside	Flavonoids	Flavonols	Lmsp003881	942843	586150	5.34113e+06	--	--
mws1035	Kaempferol-3-O-robinoside-7-O-rhamnoside (Robinin)	Flavonoids	Flavonols	mws1035	982417	410943	1935500	C10178	--
HJAP061	Quercetin-3-O-(2''-O-arabinosyl)rutinoside	Flavonoids	Flavonols	HJAP061	57330	1376800	828607	--	--
Hmqp002870	Luteolin-7-O-Sophoroside-5-O-arabinoside	Flavonoids	Flavonoid	Hmqp002870	438860	1.02356e+06	5.52287e+06	--	--
Lmcp004347	Cyanidin-3-O-(6''-O-caffeoyl-2''-O-xylosyl)glucoside	Flavonoids	Anthocyanins	Lmcp004347	38131.7	3406100	241843	--	--
pmb0660	Isoorientin-7-O-(6''-p-coumaroyl)glucoside	Flavonoids	Flavonoid carbonoside	pmb0660	14736.3	50234	139560	--	--
Lnrp102163	Quercetin-3-O-rutinoside-7-O-rhamnoside	Flavonoids	Flavonols	Lnrp102163	4952000	1.45217e+07	3.60203e+07	--	--
pmp001105	Kaempferol-3-O-neohesperidoside-7-O-glucoside	Flavonoids	Flavonols	pmp001105	529087	28526	1.94967e+06	--	--
Zmgp002857	quercetin 3-O-α-rhamnopyranosyl (1→2)-[α-rhamnopyranosyl (1→6)]-β-glucopyranoside	Flavonoids	Flavonols	Zmgp002857	162293	300800	1441000	--	--
Lmpp003268	Kaempferol-3-O-rutinoside-7-O-glucoside	Flavonoids	Flavonols	Lmpp003268	28255000	649077	1.10288e+06	--	--
HJAP127	Quercetin-3-O-(2''-O-Rhamnosyl)rutinoside	Flavonoids	Flavonols	HJAP127	4.84437e+06	1.24847e+07	35649000	--	--
Lmjp003206	Quercetin-3-O-Sambubioside-5-O-Glucoside	Flavonoids	Flavonols	Lmjp003206	237570	624720	2.21593e+06	--	--
pmb0672	Isovitexin-7-O-(6''-feruloyl)glucoside	Flavonoids	Flavonoid carbonoside	pmb0672	43503.3	6372.67	35934.7	--	--
HJAP128	Isorhamnetin-3-O-rutinoside-7-O-rhamnoside	Flavonoids	Flavonols	HJAP128	137090	373880	2413200	--	--
Lmdp004336	Kaempferol-3-O-(6'''-Caffeoyl)glucosyl-(1→2)-Galactoside	Flavonoids	Flavonols	Lmdp004336	2616.17	14100.7	14460.3	--	--
Lmsp002982	Quercetin-3-O-sophoroside-7-O-rhamnoside	Flavonoids	Flavonols	Lmsp002982	22117	18931.7	97431.3	--	--
Lmmp002755	Quercetin-7-O-rutinoside-4'-O-glucoside	Flavonoids	Flavonols	Lmmp002755	57291.7	32898.7	115448	--	--
Lmmp002529	Gossypetin-3-O-rutinoside-8-O-rhamnoside	Flavonoids	Flavonols	Lmmp002529	149057	71358	317547	--	--
Lmmp002334	Quercetin-3-O-rutinoside-7-O-glucoside	Flavonoids	Flavonols	Lmmp002334	154850	14815.4	1286200	--	--
Zmhp002640	6-Hydroxykaempferol 3-Rutinoside-6-glucoside	Flavonoids	Flavonols	Zmhp002640	132700	15139.7	1.21887e+06	--	--
Lmqp001553	Delphinidin-3-O-sophoroside-5-O-glucoside	Flavonoids	Anthocyanins	Lmqp001553	23826.3	9	9	--	--
pmb2947	Catechin-catechin-catechin	Flavonoids	Flavanols	pmb2947	1.55383e+06	2.71133e+06	2.33923e+06	--	--
Hmmn002691	Eriodictyol-5,3'-Di-O-rutinoside	Flavonoids	Dihydroflavone	Hmmn002691	3975.17	15727	17412.7	--	--
Lmsp003853	Quercetin-3-O-(6''-O-p-coumaroyl)sophoroside-7-O-rhamnoside	Flavonoids	Flavonols	Lmsp003853	14396	45467.3	298943	--	--
Cwjp002681	Kaempferol-3-O-(2'''-p-Coumaroyl)sophoroside-7-O-Glucoside	Flavonoids	Flavonols	Cwjp002681	9035.97	7436.07	7976.33	--	--
Lmmp004360	Tricin-7-O-[glucuronyl(1→3)]-[(2''-O-p-Coumaroyl)glucuronyl](2→1)glucuronide	Flavonoids	Flavonoid	Lmmp004360	7209.1	31674	8848.17	--	--
mws0024	Gallic acid	Tannins	Tannin	mws0024	120832	11237.3	16869.7	C01424	--
MWS20201	1-O-galloyl-β-D-glucose*	Tannins	Tannin	MWS20201	219050	252167	364070	C01158	--
Lmfn000604	6-O-Galloyl-D-glucose*	Tannins	Tannin	Lmfn000604	1.33389e+07	4.57237e+06	3.43353e+07	--	--
Cmsn000894	7-O-Galloyl-D-sedoheptulose	Tannins	Tannin	Cmsn000894	1870.03	4098.57	1878.67	--	--
Hmln003405	Ellagic acid-4-O-rhamnoside	Tannins	Tannin	Hmln003405	38708	30954	57186	--	--
Zmdn002353	Epicatechin-6-C-β-D-glucopyranoside	Tannins	Tannin	Zmdn002353	957290	1.66073e+06	1.12643e+06	--	--
Zmdn002400	Epicatechin-3'-O-β-D-glucopyranoside	Tannins	Tannin	Zmdn002400	990017	1.60097e+06	1089190	--	--
Zmdn002049	Epicatechin-4'-O-β-D-glucopyranoside	Tannins	Tannin	Zmdn002049	995897	1.79667e+06	1.05143e+06	--	--
Lmsn005754	1-O-Galloyl-2-O-Cinnamoyl-β-D-glucose	Tannins	Tannin	Lmsn005754	22298.7	4315.83	18966	--	--
Lmsn005333	4-O-Galloyl-1-O-Cinnamoyl-β-D-glucose	Tannins	Tannin	Lmsn005333	5352.1	2408.37	6453	--	--
Lmsn005122	1-O-Galloyl-6-O-Cinnamoyl-β-D-glucose	Tannins	Tannin	Lmsn005122	2774.7	10088.8	4751.03	--	--
Lmfn001344	Maplexin C (2,3-Di-O-Galloyl-1,5-Anhydro-D-Glucitol)	Tannins	Tannin	Lmfn001344	3755.03	11156	27374.3	--	--
pmn001523	Trigallic acid	Tannins	Tannin	pmn001523	4363	17245.5	17994	--	--
Lmsn004162	1-O-Galloyl-2-O-p-Coumaroyl-β-D-glucose	Tannins	Tannin	Lmsn004162	50134	78867.7	30364.3	--	--
Lmsn004321	1-O-Caffeoyl-3-O-galloyl-β-D-glucose	Tannins	Tannin	Lmsn004321	1400500	1.39547e+06	5.30207e+06	--	--
Lmsn004322	1,6-Di-O-caffeoyl-β-D-glucose	Tannins	Tannin	Lmsn004322	3585700	8.77673e+06	8.40343e+06	--	--
Lmsn004323	1-O-Galloyl-2-O-Feruloyl-β-D-glucose	Tannins	Tannin	Lmsn004323	55077.3	2892.93	33212	--	--
MWSHY0117	Theaflavin	Tannins	Proanthocyanidins	MWSHY0117	85138	677.967	2878.77	--	--
pme0430	Procyanidin A1	Tannins	Proanthocyanidins	pme0430	66730.7	56533.7	91191.7	--	--
pme0432	Procyanidin A2	Tannins	Proanthocyanidins	pme0432	188127	161700	193977	C10237	--
mws0836	Procyanidin B1*	Tannins	Proanthocyanidins	mws0836	20625000	23006000	2.13513e+07	--	--
pme0436	Procyanidin B3*	Tannins	Proanthocyanidins	pme0436	102654	375580	331160	--	--
MWSHY0171	Procyanidin B2	Tannins	Proanthocyanidins	MWSHY0171	2.86373e+07	3.73963e+07	3.79753e+07	C17639	--
pmn001667	Procyanidin B4	Tannins	Proanthocyanidins	pmn001667	28543000	2.75567e+07	32858000	C10238	--
HJN074	Procyanidin A6	Tannins	Proanthocyanidins	HJN074	34103.3	11016	27262.7	--	--
Zmwp002963	Aesculitannin B	Tannins	Tannin	Zmwp002963	25842.7	91305.3	83397.7	--	--
pmn001646	Procyanidin C1	Tannins	Proanthocyanidins	pmn001646	1.27517e+07	1.07918e+07	1.18047e+07	C17624	--
pmn001647	Procyanidin C2	Tannins	Proanthocyanidins	pmn001647	748393	2.21677e+06	1916200	--	--
