# Supplementary material for: Integrated transcriptome and metabolome profiling of Camellia reticulata reveal mechanisms of flower color differentiation
Source: Front Genet. 2022 Nov 22;13:1059717. doi: 10.3389/fgene.2022.1059717 (PMC9725097; doi:10.3389/fgene.2022.1059717)
Supplement: Supplementary file 9 [file Table5.xlsx]

## Sheet: Table S5A
Supplementary Table 5A: Differentially accumulated metabolites detected in the petals of Camellia reticulata ‘Yunnan Camellia’ (HHYC) and C. reticulata ‘Xuejiao’ (XJ) upon application of partial least squares discriminant analysis (PLS-DA) with threshold of log2FC ≥1 and variable importance in projection (VIP) ≥1. The expression values are averages of the three replicates in each cultivar.
Index	Formula	Compounds	Class I	Class II	CAS	Level	HHYC	XJ	VIP	p_value	Fold_Change	Log2FC	Type
pme2960	C15H12O5	Naringenin chalcone*	Flavonoids	Chalcones	73692-50-9	3	524910	127873	1.23778	0.0549565	0.24361	-2.03735	down
mws0914	C15H12O5	Pinobanksin*	Flavonoids	Dihydroflavonol	548-82-3	2	325727	83291	1.24401	0.0573522	0.255708	-1.96743	down
pme3475	C15H12O5	Butin	Flavonoids	Dihydroflavone	492-14-8	2	77485.3	32848	1.23682	0.0130513	0.423925	-1.23812	down
MWSHY0017	C15H12O5	(±)-Naringenin; 4',5,7-Trihydroxyflavanone	Flavonoids	Dihydroflavone	67604-48-2	1	519800	120273	1.25374	0.0402842	0.231384	-2.11164	down
MWSHY0098	C15H14O7	Epigallocatechin	Flavonoids	Flavanols	970-74-1	1	1.86693e+06	11663.7	1.05632	0.0227014	0.0062475	-7.32251	down
Lmdp003808	C16H12O7	Azaleatin (5-O-Methylquercetin)	Flavonoids	Flavonols	529-51-1	2	32367.3	12523.3	1.1898	0.0428207	0.386913	-1.36992	down
Lmfn000604	C13H16O10	6-O-Galloyl-D-glucose*	Tannins	Tannin	13186-19-1	2	1.33389e+07	4.57237e+06	1.179	0.0952506	0.342785	-1.54462	down
Smlp002532	C20H19O10+	Cyanidin-3-O-arabinoside*	Flavonoids	Anthocyanins	27214-72-8	1	3.00603e+07	15886	1.15988	0.00286364	0.000528471	-10.8859	down
Hmhp002834	C20H19O10+	Cyanidin 3-xyloside*	Flavonoids	Anthocyanins	29761-24-8	1	2.79413e+07	24756	1.14446	0.000993685	0.000885999	-10.1404	down
pme3392	C21H21O10+	Pelargonidin-3-O-glucoside	Flavonoids	Anthocyanins	47684-27-5	1	22014000	9	1.28563	0.000873568	4.08831e-07	-21.222	down
Smlp001915	C20H19O11+	Delphinidin-3-O-arabinoside	Flavonoids	Anthocyanins	-	3	207653	9	1.28563	0.00206004	4.33415e-05	-14.4939	down
pmb0550	C21H21O11+	Cyanidin-3-O-glucoside (Kuromanin)*	Flavonoids	Anthocyanins	47705-70-4	1	15752000	9	1.28564	0.00158848	5.71356e-07	-20.7391	down
pmf0027	C21H21O11+	Cyanidin-3-O-galactoside*	Flavonoids	Anthocyanins	142506-26-1	1	1.30497e+07	28850	1.07663	0.000873353	0.00221078	-8.82123	down
HJN041	C21H24O11	Epicatechin glucoside	Flavonoids	Flavanols	-	1	9.31353e+06	2.05143e+06	1.28005	0.00339213	0.220264	-2.1827	down
Lmsn005754	C22H22O11	1-O-Galloyl-2-O-Cinnamoyl-β-D-glucose	Tannins	Tannin	56994-83-3	2	22298.7	4315.83	1.20141	0.0252628	0.193547	-2.36925	down
pmf0203	C22H23O11+	Peonidin-3-O-glucoside	Flavonoids	Anthocyanins	68795-37-9	1	1.10687e+07	9	1.28562	0.000129386	8.13106e-07	-20.2301	down
mws0056	C21H20O12	Myricetin-3-O-rhamnoside (Myricitrin)	Flavonoids	Flavonols	17912-87-7	3	210133	8377.17	1.25743	0.0526318	0.039866	-4.6487	down
pme1398	C21H21O12+	Delphinidin-3-O-glucoside (Mirtillin)*	Flavonoids	Anthocyanins	50986-17-9	1	1.82577e+07	9	1.28552	0.00453589	4.92944e-07	-20.9521	down
Lmcp001821	C21H21O12+	Delphinidin-3-O-galactoside*	Flavonoids	Anthocyanins	28500-00-7	1	18885000	9	1.28562	0.000572865	4.76569e-07	-21.0008	down
Lmmp001947	C21H20O13	Gossypetin-3-O-glucoside	Flavonoids	Flavonols	-	3	291213	20743.7	1.25107	0.0261028	0.0712319	-3.81133	down
Lmfp003403	C21H20O13	Quercetagetin-7-O-glucoside	Flavonoids	Flavonols	548-75-4	3	301260	35656.7	1.22499	0.0293651	0.118358	-3.07877	down
pmb3045	C23H22O13	Tricin-7-O-Glucuronide	Flavonoids	Flavonoid	-	1	20836	5174.63	1.22906	0.00442642	0.248351	-2.00955	down
Lmsn004323	C23H24O13	1-O-Galloyl-2-O-Feruloyl-β-D-glucose	Tannins	Tannin	-	2	55077.3	2892.93	1.26088	0.046704	0.0525249	-4.25085	down
pmb3041	C23H22O14	Tricin-7-O-saccharic acid	Flavonoids	Flavonoid	-	2	4599400	1.24245e+06	1.19339	0.030107	0.270132	-1.88826	down
pmb0542	C24H23O14+	Cyanidin-3-O-(6''-O-malonyl)glucoside	Flavonoids	Anthocyanins	171828-62-9	3	360783	9	1.28522	0.0333747	2.49457e-05	-15.2908	down
MWSHY0117	C29H24O12	Theaflavin	Tannins	Proanthocyanidins	4670-05-7	1	85138	677.967	1.14509	0.0996564	0.00796315	-6.97245	down
Lmsn007789	C30H30O11	Phloretin-4'-O-(6''-Cinnamoyl)glucoside	Flavonoids	Chalcones	-	3	16279.7	3071.37	1.12171	0.00682002	0.188663	-2.40612	down
Zmpn004068	C26H32O14	Phloretin-2'-O-(6''-O-xylosyl)glucoside	Flavonoids	Chalcones	-	1	5810900	2.01313e+06	1.2715	0.000219124	0.346441	-1.52932	down
Lmpp003930	C30H26O12	Apigenin-7-O-(6''-p-Coumaryl)glucoside	Flavonoids	Flavonoid	-	2	2.93843e+06	748340	1.25804	0.000155132	0.254673	-1.97328	down
MWSmce498	C27H30O14	Rhoifolin	Flavonoids	Flavonoid carbonoside	17306-46-6	2	2.67813e+06	323730	1.23477	0.00582937	0.120879	-3.04836	down
Lmmp003672	C31H28O12	8,8'-Methylenebiscatechin	Flavonoids	Flavanols	81555-08-0	3	197783	87281.3	1.21905	0.00307792	0.441298	-1.18018	down
HJN074	C31H28O12	Procyanidin A6	Tannins	Proanthocyanidins	-	3	34103.3	11016	1.27317	0.00389813	0.323018	-1.63031	down
MWSHY0080	C27H30O15	Luteolin-7-O-neohesperidoside (Lonicerin)	Flavonoids	Flavonoid	25694-72-8	1	4.02253e+06	1484200	1.25925	0.02423	0.368971	-1.43842	down
pmp000593	C27H30O15	Luteolin-7-O-rutinoside*	Flavonoids	Flavonoid	3563-98-2	1	23600000	10491500	1.2449	0.0214923	0.444555	-1.16957	down
MWSHY0061	C27H30O15	Kaempferol-3-O-neohesperidoside	Flavonoids	Flavonols	32602-81-6	1	3.45023e+06	1.44983e+06	1.22277	0.0524648	0.420213	-1.25081	down
MWSHY0050	C27H30O15	Kaempferol-3-O-rutinoside(Nicotiflorin)	Flavonoids	Flavonols	17650-84-9	1	3.04733e+06	1201400	1.22607	0.0427002	0.394246	-1.34283	down
pme1773	C27H31O15+	Cyanidin-3-O-rutinoside (Keracyanin)	Flavonoids	Anthocyanins	28338-59-2	1	2957200	9	1.28555	0.00850221	3.04342e-06	-18.3259	down
MWSHY0092	C27H32O15	Eriodictyol-7-O-Rutinoside (Eriocitrin)	Flavonoids	Dihydroflavone	13463-28-0	2	13007000	283980	1.26325	0.0064017	0.0218329	-5.51736	down
Lmpp003929	C31H29O13+	Peonidin-3-O-(6''-O-p-coumaroyl)glucoside	Flavonoids	Anthocyanins	-	3	1.27593e+06	29947.7	1.22367	0.00203195	0.0234712	-5.41296	down
Lmbp002592	C27H30O16	Kaempferol-3,7-di-O-glucoside	Flavonoids	Flavonols	-	3	5.01683e+07	138547	1.27963	0.0116209	0.00276164	-8.50026	down
Hmpp002612	C27H30O16	Luteolin-7-O-gentiobioside	Flavonoids	Flavonoid	-	1	6.19657e+07	9	1.28561	0.00803744	1.45242e-07	-22.715	down
Zmjp003031	C27H30O16	Orientin-2''-O-galactoside	Flavonoids	Flavonoid carbonoside	-	3	3990800	268493	1.26413	0.0459918	0.0672781	-3.89372	down
pme1777	C27H31O16+	Cyanidin-3,5-O-diglucoside (Cyanin)	Flavonoids	Anthocyanins	2611-67-8	1	3.00243e+07	36218.3	1.28412	0.00449889	0.0012063	-9.6952	down
Lmsn006905	C31H32O13	Phloretin-4'-O-(6''-Feruloyl)glucoside	Flavonoids	Chalcones	-	3	136073	31300.3	1.17574	0.0274587	0.230025	-2.12013	down
HJN051	C28H32O16	Tamarixetin-3-O-rutinoside	Flavonoids	Flavonols	-	2	45004.3	18582.7	1.12547	0.0137938	0.412908	-1.27611	down
HJAP120	C28H32O16	Rhamnetin-3-O-Rutinoside	Flavonoids	Flavonols	-	3	238773	80628.7	1.23503	0.0188396	0.337679	-1.56628	down
Zmxp002867	C28H32O16	Chrysoeriol-5,7-di-O-glucoside	Flavonoids	Flavonoid	-	3	18774.2	5332.73	1.03795	0.136842	0.284046	-1.8158	down
Lmsp004721	C28H32O16	Tamarixetin-3-O-glucoside-7-O-rhamnoside	Flavonoids	Flavonols	-	3	284010	138024	1.17201	0.00490986	0.485982	-1.04103	down
MWSHY0064	C28H32O16	Isorhamnetin-3-O-neohespeidoside	Flavonoids	Flavonols	55033-90-4	1	254717	116415	1.13837	0.0152972	0.457037	-1.12962	down
pmf0116	C27H31O17+	Delphinidin-3,5-di-O-glucoside	Flavonoids	Anthocyanins	17670-06-3	1	4.17113e+06	11328.3	1.28325	0.000545874	0.00271588	-8.52436	down
pmb0578	C32H30O15	Luteolin-7-O-(6''-sinapoyl)glucoside	Flavonoids	Flavonoid	-	1	25626.7	12699.7	1.24117	0.00775837	0.495565	-1.01286	down
Zmhp003322	C36H36O17	Isovitexin-2''-O-(6'''-p-coumaroyl)glucoside	Flavonoids	Flavonoid carbonoside	-	2	136540	31120	1.20201	0.0596824	0.227918	-2.13341	down
mws1035	C33H40O19	Kaempferol-3-O-robinoside-7-O-rhamnoside (Robinin)	Flavonoids	Flavonols	301-19-9	1	982417	410943	1.20726	0.0421487	0.418298	-1.2574	down
pmp001105	C33H40O20	Kaempferol-3-O-neohesperidoside-7-O-glucoside	Flavonoids	Flavonols	-	1	529087	28526	1.28316	0.00902098	0.0539156	-4.21315	down
Lmpp003268	C33H40O20	Kaempferol-3-O-rutinoside-7-O-glucoside	Flavonoids	Flavonols	-	1	28255000	649077	1.2733	0.00671727	0.0229721	-5.44397	down
pmb0672	C37H38O18	Isovitexin-7-O-(6''-feruloyl)glucoside	Flavonoids	Flavonoid carbonoside	-	3	43503.3	6372.67	1.17492	0.00100198	0.146487	-2.77116	down
Lmmp002529	C33H40O21	Gossypetin-3-O-rutinoside-8-O-rhamnoside	Flavonoids	Flavonols	-	1	149057	71358	1.17327	0.0421488	0.478731	-1.06271	down
Lmmp002334	C33H40O21	Quercetin-3-O-rutinoside-7-O-glucoside	Flavonoids	Flavonols	-	1	154850	14815.4	1.2293	0.0205199	0.0956758	-3.3857	down
Zmhp002640	C33H40O21	6-Hydroxykaempferol 3-Rutinoside-6-glucoside	Flavonoids	Flavonols	-	2	132700	15139.7	1.25357	0.0113946	0.114089	-3.13176	down
Lmqp001553	C33H41O22+	Delphinidin-3-O-sophoroside-5-O-glucoside	Flavonoids	Anthocyanins	-	3	23826.3	9	1.28345	0.0494557	0.000377733	-11.3703	down
MWSHY0051	C15H10O6	Kaempferol (3,5,7,4'-Tetrahydroxyflavone)	Flavonoids	Flavonols	520-18-3	1	118946	244257	1.0406	0.0858959	2.05351	1.03809	up
MWSHY0069	C16H12O6	Hispidulin (5,7,4'-Trihydroxy-6-methoxyflavone)	Flavonoids	Flavonoid	1447-88-7	3	3763.87	18846.7	1.17366	0.134608	5.00726	2.32402	up
mws0920	C15H10O7	Tricetin (5,7,3',4',5'-Pentahydroxyflavone)	Flavonoids	Flavonoid	520-31-0	2	22001.7	66287.7	1.23987	0.00127593	3.01285	1.59113	up
mws1033	C16H14O6	Homoeriodictyol	Flavonoids	Dihydroflavone	446-71-9	2	10402.9	28406.3	1.11421	0.0870479	2.73063	1.44923	up
Lmmp003109	C16H16O6	3'-O-Methyl-(-)-epicatechin	Flavonoids	Flavanols	76549-34-3	3	94604	203853	1.04539	0.123391	2.15481	1.10756	up
pmb0580	C21H20O9	Chrysin-5-O-glucoside (Toringin)	Flavonoids	Flavonoid	1329-10-8	3	2459	45426.7	1.22236	0.0340779	18.4737	4.2074	up
HJAP012	C20H18O10	Luteolin-8-C-arabinoside	Flavonoids	Flavonoid carbonoside	-	3	24932	62050.7	1.18465	0.033431	2.4888	1.31545	up
Lmbp003668	C20H18O10	Kaempferol-3-O-arabinoside	Flavonoids	Flavonols	-	1	646227	3209500	1.25763	0.0315068	4.96652	2.31224	up
Lmyp004617	C21H22O9	Pinocembrin-7-O-glucoside (Pinocembroside)	Flavonoids	Dihydroflavone	75829-43-5	3	12612.8	57447.3	1.23415	0.0310393	4.55467	2.18735	up
mws0072	C21H20O10	Apigenin-5-O-glucoside	Flavonoids	Flavonoid	28757-27-9	1	757323	9145300	1.27501	0.0016017	12.0758	3.59405	up
MWSHY0181	C21H20O10	Apigenin-8-C-Glucoside (Vitexin)	Flavonoids	Flavonoid carbonoside	3681-93-4	1	15694.7	360963	1.22631	0.0503329	22.999	4.5235	up
pmn001716	C21H20O11	Carthamone	Flavonoids	Chalcones	86579-00-2	1	2486200	8.39407e+06	1.21658	0.00728716	3.37626	1.75543	up
mws0089	C21H20O11	Kaempferol-7-O-glucoside	Flavonoids	Flavonols	16290-07-6	2	3.03347e+06	1.37387e+07	1.25845	0.0136955	4.52903	2.1792	up
Hmpp003270	C21H20O11	Luteolin-4'-O-glucoside	Flavonoids	Flavonoid	6920-38-3	1	2.12187e+06	4607900	1.23777	0.0140453	2.17163	1.11878	up
mws0913	C21H20O11	Kaempferol-3-O-galactoside (Trifolin)	Flavonoids	Flavonols	23627-87-4	1	15640000	3.88577e+07	1.27138	0.000562693	2.48451	1.31296	up
MWSHY0104	C21H20O11	Luteolin-7-O-glucoside (Cynaroside)	Flavonoids	Flavonoid	5373-11-5	1	1558200	4602100	1.25731	0.00932846	2.95347	1.56241	up
MWSHY0136	C21H20O11	Kaempferol-3-O-glucoside (Astragalin)	Flavonoids	Flavonols	480-10-4	1	1584300	4399400	1.27427	0.0102644	2.77687	1.47346	up
MWS20145	C21H22O11	eriodictyol 7-O-β-D-glucopyranoside	Flavonoids	Dihydroflavone	-	2	4757900	1.35983e+07	1.27677	0.00861041	2.85805	1.51503	up
Lmsp004301	C21H22O11	3',5,5',7-Tetrahydroxyflavanone-7-O-glucoside	Flavonoids	Dihydroflavone	-	2	3.17353e+06	6508500	1.02063	0.143787	2.05087	1.03624	up
pmb3023	C21H22O11	Eriodictyol-8-C-glucoside	Flavonoids	Dihydroflavone	1023271-51-3	3	1.10613e+06	2814200	1.27593	0.00817991	2.54418	1.3472	up
Lmtn002796	C21H22O11	Aromadendrin-7-O-glucoside	Flavonoids	Dihydroflavonol	28189-90-4	1	2.91113e+06	5.85817e+06	1.14306	0.0130839	2.01233	1.00887	up
Lmzn001894	C21H18O12	Kaempferol-3-O-glucuronide	Flavonoids	Flavonols	22688-78-4	1	2247500	8766000	1.23432	0.0435258	3.90033	1.9636	up
Hmmp004965	C22H22O11	Diosmetin-7-O-glucoside*	Flavonoids	Dihydroflavone	20126-59-4	1	715053	1731200	1.24	0.0346581	2.42108	1.27565	up
Lmsn005122	C22H22O11	1-O-Galloyl-6-O-Cinnamoyl-β-D-glucose	Tannins	Tannin	115746-69-5	3	2774.7	10088.8	1.23173	0.0128855	3.63598	1.86235	up
pmb2999	C22H22O11	Chrysoeriol-5-O-glucoside	Flavonoids	Flavonoid	-	3	1017040	2.46843e+06	1.05638	0.163851	2.42708	1.27922	up
Lmjp003655	C22H22O11	6-C-MethylKaempferol-3-glucoside	Flavonoids	Flavonoid	-	1	712817	1909500	1.22495	0.0600442	2.67881	1.42159	up
pmp000579	C22H22O11	Diosmetin-7-O-galactoside*	Flavonoids	Dihydroflavone	-	1	718797	1.74117e+06	1.19539	0.0644835	2.42234	1.2764	up
MWSslk237	C22H22O11	Homoplantaginin	Flavonoids	Other Flavonoids	17680-84-1	3	692403	1.85453e+06	1.21153	0.0356114	2.6784	1.42137	up
Lmfn001344	C20H20O13	Maplexin C (2,3-Di-O-Galloyl-1,5-Anhydro-D-Glucitol)	Tannins	Tannin	-	3	3755.03	11156	1.14069	0.00899743	2.97095	1.57092	up
Lmqp006281	C23H22O11	Kaempferol-3-O-(4''-O-acetyl)rhamnoside	Flavonoids	Flavonols	-	1	58437	130590	1.21493	0.00359623	2.23471	1.16009	up
Lmjp003295	C22H22O12	6-Methoxykaempferol-3-O-glucoside	Flavonoids	Flavonols	63422-27-5	3	40944	86832.3	1.00154	0.107408	2.12076	1.08458	up
pmb2987	C24H24O11	Acacetin-7-O-(6''-O-acetyl)glucoside	Flavonoids	Flavonoid	-	3	74736.7	786587	1.23657	0.0802541	10.5248	3.39572	up
Lmmn003398	C23H22O12	Kaempferol-3-O-(6''-acetyl)glucoside	Flavonoids	Flavonols	-	1	825167	2.21403e+06	1.12887	0.0998941	2.68313	1.42392	up
Lmmp003817	C24H22O14	Kaempferol-3-O-(6''-malonyl)glucoside*	Flavonoids	Flavonols	-	1	2.87147e+06	6.75203e+06	1.17669	0.0803144	2.35142	1.23353	up
Lmdp004892	C24H22O14	Kaempferol-3-O-(6''-malonyl)galactoside*	Flavonoids	Flavonols	-	1	2522000	6711100	1.17286	0.0856843	2.66102	1.41198	up
pmb0686	C24H24O14	Eriodictyol-7-O-(6''-malonyl)glucoside	Flavonoids	Dihydroflavone	-	3	2564.77	10697.4	1.19189	0.117704	4.17091	2.06036	up
Hmln002189	C24H22O15	Quercetin-3-O-(6''-malonyl)galactoside	Flavonoids	Flavonols	-	1	206290	591103	1.02456	0.232995	2.8654	1.51874	up
HJN078	C26H30O13	Pinocembrin-7-O-(2''-O-arabinosyl)glucoside	Flavonoids	Dihydroflavone	-	2	17201.3	110019	1.21895	0.02892	6.39596	2.67716	up
pmb3114	C30H26O11	Epicatechin-epiafzelechin	Flavonoids	Flavanols	-	1	1060110	3.09547e+06	1.22523	0.0204833	2.91995	1.54594	up
mws1292	C26H28O14	Isoschaftoside	Flavonoids	Flavonoid carbonoside	52012-29-0	2	38725	139040	1.23436	0.0588825	3.59045	1.84416	up
Zmjp003463	C26H28O14	"Vitexin-2""-O-xyloside"	Flavonoids	Flavonoid carbonoside	-	2	81966.7	189163	1.08394	0.0144788	2.30781	1.20652	up
Lmnp102580	C26H28O14	Apigenin-6-C-(2''-xylosyl)glucoside	Flavonoids	Flavonoid carbonoside	-	2	73690	177357	1.0921	0.0164356	2.40679	1.26711	up
Lmtp002474	C26H28O14	Apigenin-6-C-(2''-glucosyl)arabinoside	Flavonoids	Flavonoid carbonoside	-	3	59224.7	213847	1.17937	0.0921237	3.61077	1.85231	up
Lmtp002642	C26H28O14	Apigenin-8-C-(2''-glucosyl)arabinoside	Flavonoids	Flavonoid carbonoside	-	3	37828.3	81542.3	1.18017	0.0608413	2.15559	1.10808	up
Lmmp003306	C25H26O15	Quercetin-3-O-xylosyl(1→2)arabinoside	Flavonoids	Flavonols	-	1	7228.23	779817	1.28047	0.0355974	107.885	6.75335	up
pme0436	C30H26O12	Procyanidin B3*	Tannins	Proanthocyanidins	23567-23-9	1	102654	375580	1.27827	0.000481207	3.65871	1.87134	up
pme3227	C27H30O14	Vitexin-2''-O-rhamnoside	Flavonoids	Flavonoid carbonoside	64820-99-1	3	67623	1.85577e+06	1.26721	0.0289671	27.4428	4.77836	up
Lmlp002990	C27H30O15	Isosaponarin(Isovitexin-4'-O-glucoside)	Flavonoids	Flavonoid carbonoside	19416-87-6	3	3948.6	20582.6	1.12285	0.192159	5.21263	2.38201	up
mws1073	C27H30O15	Apigenin-6,8-di-C-glucoside (Vicenin-2)	Flavonoids	Flavonoid carbonoside	23666-13-9	3	13677	63879.7	1.26282	0.0296332	4.67059	2.2236	up
Lmjp002596	C26H28O16	Quercetin-3-O-sambubioside*	Flavonoids	Flavonols	83048-35-5	1	205587	4788600	1.25989	0.0685096	23.2924	4.54179	up
Lmln001951	C26H28O16	Quercetin-3-O-(6''-O-arabinosyl)glucoside	Flavonoids	Flavonols	-	3	16879.7	971383	1.27303	0.0638985	57.5475	5.84668	up
Hmgp002121	C31H28O13	Hispidulin-7-O-(6''-O-p-Coumaroyl)Glucoside	Flavonoids	Flavonoid	-	3	6162.27	18496.3	1.20267	0.0325923	3.00155	1.58571	up
Lmdp004267	C30H26O14	Quercetin-3-O-(6''-p-Coumaroyl)glucoside	Flavonoids	Flavonols	-	1	22900.3	132606	1.19714	0.119011	5.79057	2.53371	up
Lmyp004052	C30H26O14	Quercetin-3-O-(6''-p-Coumaroyl)galactoside	Flavonoids	Flavonols	-	1	9968.67	130113	1.16339	0.0831536	13.0522	3.70622	up
MWSHY0019	C28H34O15	Hesperetin-7-O-neohesperidoside(Neohesperidin)	Flavonoids	Dihydroflavone	13241-33-3	2	21366	466987	1.25699	0.0652113	21.8565	4.44999	up
MWSHY0142	C28H24O16	Quercetin-3-O-(2''-galloyl)galactoside	Flavonoids	Flavonols	53209-27-1	1	11993.3	40082	1.21631	0.0526459	3.34202	1.74072	up
Lmmp002963	C28H32O16	6-C-Methylquercetin-3-O-rutinoside	Flavonoids	Flavonols	-	3	11216.6	36517.3	1.0622	0.164982	3.25565	1.70295	up
pmp001311	C27H30O17	6-Hydroxykaempferol-7,6-O-Diglucoside	Flavonoids	Flavonols	-	1	184920	531580	1.19165	0.0521035	2.87465	1.52339	up
Zmcp002666	C27H30O17	Quercetin3,7-diglucoside	Flavonoids	Flavonols	-	2	85501	437933	1.23567	0.011724	5.12197	2.3567	up
pmb0618	C28H34O16	Hesperetin-8-C-glucoside-3'-O-glucoside	Flavonoids	Flavonoid carbonoside	-	3	66749	191123	1.22142	0.0516125	2.86331	1.51769	up
Hmln001836	C29H32O17	Kaempferol-3-O-(6''-Acetyl)glucosyl-(1→3)-Galactoside	Flavonoids	Flavonols	-	1	8894.17	73465.7	1.19202	0.0962297	8.25998	3.04614	up
Hmqp003184	C29H30O18	Luteolin-7-O-(6''-malonyl)glucoside-5-O-arabinoside	Flavonoids	Flavonoid	-	1	16401.3	72159.7	1.12783	0.127408	4.39962	2.13738	up
Lmjp002491	C35H35O17+	Cyanidin-3-O-(6''-O-p-coumaroyl-2''-O-xylosyl)glucoside	Flavonoids	Anthocyanins	-	1	771273	28742000	1.27769	0.0412668	37.2656	5.21977	up
pmb0680	C36H36O17	Vitexin-7-O-(6''-p-coumaroyl)glucoside	Flavonoids	Flavonoid carbonoside	-	2	54351.3	134103	1.08498	0.0307431	2.46734	1.30295	up
HJAP061	C32H38O20	Quercetin-3-O-(2''-O-arabinosyl)rutinoside	Flavonoids	Flavonols	-	1	57330	1376800	1.28316	0.0134473	24.0153	4.58588	up
Hmqp002870	C32H38O20	Luteolin-7-O-Sophoroside-5-O-arabinoside	Flavonoids	Flavonoid	-	2	438860	1.02356e+06	1.2092	0.0346032	2.33231	1.22176	up
Lmcp004347	C35H35O18+	Cyanidin-3-O-(6''-O-caffeoyl-2''-O-xylosyl)glucoside	Flavonoids	Anthocyanins	-	3	38131.7	3406100	1.27361	0.0400233	89.3247	6.48099	up
pmb0660	C36H36O18	Isoorientin-7-O-(6''-p-coumaroyl)glucoside	Flavonoids	Flavonoid carbonoside	-	3	14736.3	50234	1.20917	0.0197834	3.40885	1.76929	up
Lnrp102163	C33H40O20	Quercetin-3-O-rutinoside-7-O-rhamnoside	Flavonoids	Flavonols	-	1	4952000	1.45217e+07	1.25699	0.0246642	2.93249	1.55212	up
HJAP127	C33H40O20	Quercetin-3-O-(2''-O-Rhamnosyl)rutinoside	Flavonoids	Flavonols	55696-57-6	1	4.84437e+06	1.24847e+07	1.24602	0.0223742	2.57715	1.36578	up
Lmjp003206	C32H38O21	Quercetin-3-O-Sambubioside-5-O-Glucoside	Flavonoids	Flavonols	-	1	237570	624720	1.26386	0.00402409	2.62962	1.39486	up
HJAP128	C34H42O20	Isorhamnetin-3-O-rutinoside-7-O-rhamnoside	Flavonoids	Flavonols	-	1	137090	373880	1.2254	0.000988551	2.72726	1.44745	up
Lmdp004336	C36H36O19	Kaempferol-3-O-(6'''-Caffeoyl)glucosyl-(1→2)-Galactoside	Flavonoids	Flavonols	-	1	2616.17	14100.7	1.17885	0.0235532	5.38982	2.43024	up
Zmwp002963	C45H36O18	Aesculitannin B	Tannins	Tannin	-	2	25842.7	91305.3	1.21134	0.00117048	3.53312	1.82094	up
pmn001647	C45H38O18	Procyanidin C2	Tannins	Proanthocyanidins	37064-31-6	1	748393	2.21677e+06	1.12116	0.106224	2.96203	1.56659	up
Hmmn002691	C39H52O24	Eriodictyol-5,3'-Di-O-rutinoside	Flavonoids	Dihydroflavone	-	3	3975.17	15727	1.11716	0.137131	3.95631	1.98416	up
Lmsp003853	C42H46O23	Quercetin-3-O-(6''-O-p-coumaroyl)sophoroside-7-O-rhamnoside	Flavonoids	Flavonols	-	2	14396	45467.3	1.2718	0.00475026	3.15833	1.65916	up
Lmmp004360	C44H44O27	Tricin-7-O-[glucuronyl(1→3)]-[(2''-O-p-Coumaroyl)glucuronyl](2→1)glucuronide	Flavonoids	Flavonoid	-	3	7209.1	31674	1.07527	0.0174333	4.39361	2.13541	up

## Sheet: Table S5B
Supplementary Table 5B: Differentially accumulated metabolites detected in the petals of Camellia reticulata ‘Yunnan Camellia’ (HHYC) and C. reticulata ‘Tongzimian’ (TZM) upon application of partial least squares discriminant analysis (PLS-DA) with threshold of log2FC ≥1 and variable importance in projection (VIP) ≥1. The expression values are averages of the three replicates in each cultivar.
Index	Formula	Compounds	Class I	Class II	CAS	Level	HHYC	TZM	VIP	p_value	Fold_Change	Log2FC	Type
mws0024	C7H6O5	Gallic acid	Tannins	Tannin	149-91-7	1	120832	16869.7	1.15548	0.0503549	0.139612	-2.8405	down
pme2960	C15H12O5	Naringenin chalcone*	Flavonoids	Chalcones	73692-50-9	3	524910	96355.3	1.15676	0.0472647	0.183565	-2.44563	down
mws0914	C15H12O5	Pinobanksin*	Flavonoids	Dihydroflavonol	548-82-3	2	325727	65419.3	1.14065	0.0456969	0.200841	-2.31587	down
pme3475	C15H12O5	Butin	Flavonoids	Dihydroflavone	492-14-8	2	77485.3	28367.7	1.17027	0.0150269	0.366104	-1.44968	down
MWSHY0017	C15H12O5	(±)-Naringenin; 4',5,7-Trihydroxyflavanone	Flavonoids	Dihydroflavone	67604-48-2	1	519800	92963.7	1.15977	0.0331283	0.178845	-2.48322	down
Lmgp004784	C15H14O5	Apiferol	Flavonoids	Flavonoid	55167-29-8	2	85662.7	24309.3	1.12686	0.06646	0.28378	-1.81716	down
mws1094	C15H12O6	Aromadendrin (Dihydrokaempferol)	Flavonoids	Dihydroflavonol	480-20-6	1	152280	24151	1.1876	0.00854743	0.158596	-2.65657	down
mws0049	C15H14O7	Gallocatechin	Flavonoids	Flavanols	970-73-0	1	659540	46678.3	1.18672	0.0203582	0.0707741	-3.82064	down
MWSHY0098	C15H14O7	Epigallocatechin	Flavonoids	Flavanols	970-74-1	1	1.86693e+06	148013	1.18292	0.0262083	0.0792815	-3.65687	down
mws0855	C15H10O8	Gossypetin(3,3',4',5,7,8-Hexahydroxyflavone)	Flavonoids	Flavonols	489-35-0	2	7703.73	1804.17	1.17966	0.0218853	0.234194	-2.09423	down
Smlp002532	C20H19O10+	Cyanidin-3-O-arabinoside*	Flavonoids	Anthocyanins	27214-72-8	1	3.00603e+07	9	1.19627	0.00286288	2.99398e-07	-21.6714	down
Hmhp002834	C20H19O10+	Cyanidin 3-xyloside*	Flavonoids	Anthocyanins	29761-24-8	1	2.79413e+07	9	1.19623	0.000999885	3.22103e-07	-21.566	down
pme3392	C21H21O10+	Pelargonidin-3-O-glucoside	Flavonoids	Anthocyanins	47684-27-5	1	22014000	9	1.19629	0.000873568	4.08831e-07	-21.222	down
HJN087	C21H22O10	Naringenin-4'-O-glucoside	Flavonoids	Dihydroflavone	-	2	1250890	414763	1.17137	0.02416	0.331575	-1.59259	down
Smlp001915	C20H19O11+	Delphinidin-3-O-arabinoside	Flavonoids	Anthocyanins	-	3	207653	9	1.19626	0.00206004	4.33415e-05	-14.4939	down
pmb0550	C21H21O11+	Cyanidin-3-O-glucoside (Kuromanin)*	Flavonoids	Anthocyanins	47705-70-4	1	15752000	9	1.19627	0.00158848	5.71356e-07	-20.7391	down
pmf0027	C21H21O11+	Cyanidin-3-O-galactoside*	Flavonoids	Anthocyanins	142506-26-1	1	1.30497e+07	9	1.19628	0.000884951	6.89673e-07	-20.4676	down
pmn001415	C24H20O9	Catechin-(7,8-bc)-4β-(3,4-dihydroxyphenyl)-dihydro-2-(3H)-one	Flavonoids	Flavanols	-	3	160903	52514	1.17108	0.0243337	0.32637	-1.61542	down
pmn001416	C24H20O9	Catechin-(7,8-bc)-4α-(3,4-dihydroxyphenyl)-dihydro-2-(3H)-one	Flavonoids	Flavanols	-	3	1.94173e+06	376233	1.19261	0.0035983	0.193762	-2.36765	down
HJN041	C21H24O11	Epicatechin glucoside	Flavonoids	Flavanols	-	1	9.31353e+06	2.69317e+06	1.1872	0.00291585	0.289167	-1.79003	down
pmf0203	C22H23O11+	Peonidin-3-O-glucoside	Flavonoids	Anthocyanins	68795-37-9	1	1.10687e+07	9	1.19627	0.000129386	8.13106e-07	-20.2301	down
mws0056	C21H20O12	Myricetin-3-O-rhamnoside (Myricitrin)	Flavonoids	Flavonols	17912-87-7	3	210133	54066.3	1.10301	0.0828904	0.257295	-1.9585	down
pme1398	C21H21O12+	Delphinidin-3-O-glucoside (Mirtillin)*	Flavonoids	Anthocyanins	50986-17-9	1	1.82577e+07	145603	1.19522	0.00460715	0.00797491	-6.97032	down
Lmcp001821	C21H21O12+	Delphinidin-3-O-galactoside*	Flavonoids	Anthocyanins	28500-00-7	1	18885000	158770	1.19529	0.000578136	0.0084072	-6.89416	down
pmb0542	C24H23O14+	Cyanidin-3-O-(6''-O-malonyl)glucoside	Flavonoids	Anthocyanins	171828-62-9	3	360783	9	1.19561	0.0333747	2.49457e-05	-15.2908	down
pmb2979	C25H26O14	Hesperetin-7-O-(6''-malonyl)glucoside	Flavonoids	Dihydroflavone	-	3	212510	104388	1.09527	0.0678005	0.491216	-1.02557	down
HJN078	C26H30O13	Pinocembrin-7-O-(2''-O-arabinosyl)glucoside	Flavonoids	Dihydroflavone	-	2	17201.3	3753.2	1.06212	0.0741177	0.218192	-2.19633	down
MWSHY0117	C29H24O12	Theaflavin	Tannins	Proanthocyanidins	4670-05-7	1	85138	2878.77	1.17023	0.104302	0.0338129	-4.88628	down
Zmpn004068	C26H32O14	Phloretin-2'-O-(6''-O-xylosyl)glucoside	Flavonoids	Chalcones	-	1	5810900	2021900	1.17988	0.000179165	0.34795	-1.52305	down
Lmpp003930	C30H26O12	Apigenin-7-O-(6''-p-Coumaryl)glucoside	Flavonoids	Flavonoid	-	2	2.93843e+06	534230	1.19076	0.000886168	0.181808	-2.45951	down
MWSmce498	C27H30O14	Rhoifolin	Flavonoids	Flavonoid carbonoside	17306-46-6	2	2.67813e+06	334467	1.18412	0.00863155	0.124888	-3.00129	down
MWSHY0161	C30H26O13	Kaempferol-3-O-(6''-p-Coumaroyl)glucoside (Tiliroside)	Flavonoids	Flavonols	20316-62-5	1	787760	106479	1.11299	0.0461809	0.135166	-2.88719	down
Lmyp004407	C30H26O13	Kaempferol-3-O-(2''-p-Coumaroyl)galactoside	Flavonoids	Flavonols	-	1	911493	119426	1.14911	0.036751	0.131022	-2.93212	down
Lmyp004318	C30H26O13	Kaempferol-3-O-(6''-p-Coumaroyl)galactoside	Flavonoids	Flavonols	-	1	804630	113848	1.07984	0.0949828	0.141492	-2.82121	down
Hmjn004446	C30H26O13	Luteolin-7-O-(6''-caffeoyl)rhamnoside	Flavonoids	Flavonoid	-	1	1.81221e+06	271507	1.05881	0.117741	0.149821	-2.73869	down
pme1773	C27H31O15+	Cyanidin-3-O-rutinoside (Keracyanin)	Flavonoids	Anthocyanins	28338-59-2	1	2957200	9	1.19604	0.00850221	3.04342e-06	-18.3259	down
MWSHY0092	C27H32O15	Eriodictyol-7-O-Rutinoside (Eriocitrin)	Flavonoids	Dihydroflavone	13463-28-0	2	13007000	103337	1.195	0.00665265	0.0079447	-6.97579	down
Lmpp003929	C31H29O13+	Peonidin-3-O-(6''-O-p-coumaroyl)glucoside	Flavonoids	Anthocyanins	-	3	1.27593e+06	19104.7	1.19367	0.0029441	0.0149731	-6.06148	down
Lmbp002592	C27H30O16	Kaempferol-3,7-di-O-glucoside	Flavonoids	Flavonols	-	3	5.01683e+07	1.55383e+06	1.19158	0.0122537	0.0309724	-5.01287	down
Hmpp002612	C27H30O16	Luteolin-7-O-gentiobioside	Flavonoids	Flavonoid	-	1	6.19657e+07	1657300	1.19418	0.0084603	0.0267455	-5.22456	down
Xmyp005599	C27H30O16	Kaempferol-3-O-galactoside-4'-O-glucoside	Flavonoids	Flavonols	-	1	207880	65809.3	1.03667	0.082672	0.316574	-1.65939	down
Zmjp003031	C27H30O16	Orientin-2''-O-galactoside	Flavonoids	Flavonoid carbonoside	-	3	3990800	157310	1.17878	0.0435478	0.0394182	-4.66499	down
pme1777	C27H31O16+	Cyanidin-3,5-O-diglucoside (Cyanin)	Flavonoids	Anthocyanins	2611-67-8	1	3.00243e+07	111577	1.19405	0.004519	0.00371622	-8.07195	down
Hmcp005575	C27H30O17	Quercetin-5,4'-di-O-glucoside	Flavonoids	Flavonols	-	2	145313	53761.3	1.0801	0.0592352	0.369969	-1.43452	down
pmf0116	C27H31O17+	Delphinidin-3,5-di-O-glucoside	Flavonoids	Anthocyanins	17670-06-3	1	4.17113e+06	37114.3	1.19524	0.000545884	0.0088979	-6.81232	down
pmb0578	C32H30O15	Luteolin-7-O-(6''-sinapoyl)glucoside	Flavonoids	Flavonoid	-	1	25626.7	5325.67	1.14439	0.0012338	0.207817	-2.26661	down
Zmhp003322	C36H36O17	Isovitexin-2''-O-(6'''-p-coumaroyl)glucoside	Flavonoids	Flavonoid carbonoside	-	2	136540	53549.7	1.05749	0.0960374	0.392189	-1.35038	down
Lmpp003268	C33H40O20	Kaempferol-3-O-rutinoside-7-O-glucoside	Flavonoids	Flavonols	-	1	28255000	1.10288e+06	1.192	0.00705785	0.0390332	-4.67915	down
Lmqp001553	C33H41O22+	Delphinidin-3-O-sophoroside-5-O-glucoside	Flavonoids	Anthocyanins	-	3	23826.3	9	1.1934	0.0494557	0.000377733	-11.3703	down
Lmgp004167	C15H14O6	3',4,4',5,7-Pentahydroxyflavan (Luteoforol)	Flavonoids	Flavanols	13392-26-2	1	981163	3032800	1.04846	0.0337548	3.09102	1.62809	up
mws0920	C15H10O7	Tricetin (5,7,3',4',5'-Pentahydroxyflavone)	Flavonoids	Flavonoid	520-31-0	2	22001.7	97792	1.16717	0.00267978	4.44475	2.1521	up
mws1033	C16H14O6	Homoeriodictyol	Flavonoids	Dihydroflavone	446-71-9	2	10402.9	28043.7	1.08403	0.0687392	2.69576	1.43069	up
Lmmp003109	C16H16O6	3'-O-Methyl-(-)-epicatechin	Flavonoids	Flavanols	76549-34-3	3	94604	245967	1.13131	0.0437484	2.59996	1.37849	up
Lmdp003808	C16H12O7	Azaleatin (5-O-Methylquercetin)	Flavonoids	Flavonols	529-51-1	2	32367.3	93091	1.06695	0.102305	2.87608	1.5241	up
Lmfn000604	C13H16O10	6-O-Galloyl-D-glucose*	Tannins	Tannin	13186-19-1	2	1.33389e+07	3.43353e+07	1.10041	0.0188956	2.57408	1.36406	up
pmb0580	C21H20O9	Chrysin-5-O-glucoside (Toringin)	Flavonoids	Flavonoid	1329-10-8	3	2459	15171.9	1.03446	0.0799822	6.16996	2.62526	up
HJAP012	C20H18O10	Luteolin-8-C-arabinoside	Flavonoids	Flavonoid carbonoside	-	3	24932	52630.3	1.11454	0.00596723	2.11096	1.0779	up
Lmbp003668	C20H18O10	Kaempferol-3-O-arabinoside	Flavonoids	Flavonols	-	1	646227	1830600	1.13094	0.0433094	2.83275	1.5022	up
mws0072	C21H20O10	Apigenin-5-O-glucoside	Flavonoids	Flavonoid	28757-27-9	1	757323	2.72657e+06	1.08757	0.0899934	3.60027	1.8481	up
MWSHY0181	C21H20O10	Apigenin-8-C-Glucoside (Vitexin)	Flavonoids	Flavonoid carbonoside	3681-93-4	1	15694.7	243170	1.13229	0.00363772	15.4937	3.95361	up
Hmcp002316	C21H20O11	Isorhamnetin-3-O-arabinoside	Flavonoids	Flavonols	-	1	367930	753267	1.13913	0.00301772	2.04731	1.03373	up
pmn001716	C21H20O11	Carthamone	Flavonoids	Chalcones	86579-00-2	1	2486200	10839000	1.15488	0.000479495	4.35967	2.12422	up
MWS20147	C21H20O11	Luteolin-3'-O-glucoside	Flavonoids	Flavonoid	5154-41-6	1	8.09127e+06	19334000	1.16369	0.0197281	2.38949	1.2567	up
mws0089	C21H20O11	Kaempferol-7-O-glucoside	Flavonoids	Flavonols	16290-07-6	2	3.03347e+06	1.43237e+07	1.17665	0.00133853	4.72188	2.23936	up
mws0913	C21H20O11	Kaempferol-3-O-galactoside (Trifolin)	Flavonoids	Flavonols	23627-87-4	1	15640000	3.29787e+07	1.17701	0.000220747	2.10861	1.07629	up
pmn001640	C20H18O12	Myricetin-3-O-arabinoside	Flavonoids	Flavonols	132679-85-7	3	20878.3	43198	1.18842	7.44702e-05	2.06903	1.04896	up
MWS20145	C21H22O11	eriodictyol 7-O-β-D-glucopyranoside	Flavonoids	Dihydroflavone	-	2	4757900	9.93437e+06	1.18893	0.00239742	2.08797	1.0621	up
Lmpn006208	C22H22O11	8-Methoxykaempferol-7-O-rhamnoside	Flavonoids	Flavonols	-	2	116429	311797	1.11391	0.0157348	2.678	1.42116	up
pmb2999	C22H22O11	Chrysoeriol-5-O-glucoside	Flavonoids	Flavonoid	-	3	1017040	3.20267e+06	1.15506	0.00398026	3.14901	1.6549	up
MWSHY0113	C21H20O12	Quercetin-3-O-galactoside (Hyperin)	Flavonoids	Flavonols	482-36-0	1	9364100	1.92997e+07	1.19283	0.0012825	2.06103	1.04336	up
Lmzp002365	C22H24O11	Hesperetin-7-O-glucoside	Flavonoids	Dihydroflavone	31712-49-9	2	566960	2.02057e+06	1.16232	0.0208355	3.56386	1.83344	up
Lmfn001344	C20H20O13	Maplexin C (2,3-Di-O-Galloyl-1,5-Anhydro-D-Glucitol)	Tannins	Tannin	-	3	3755.03	27374.3	1.15125	0.000148795	7.29004	2.86593	up
Lmmp003783	C21H18O13	Quercetin-3-O-glucuronide	Flavonoids	Flavonols	22688-79-5	1	38546	135410	1.18982	0.00191433	3.51295	1.81268	up
pma6640	C22H22O12	3'-O-Methyltricetin-7-O-glucoside	Flavonoids	Flavonoid	-	3	52761.7	372617	1.16064	0.0310972	7.06226	2.82013	up
Lmjp003295	C22H22O12	6-Methoxykaempferol-3-O-glucoside	Flavonoids	Flavonols	63422-27-5	3	40944	289173	1.07503	0.12913	7.06265	2.82021	up
pma0249	C22H22O12	3'-O-Methyltricetin-5-O-glucoside	Flavonoids	Flavonoid	-	3	11600.9	53641.3	1.02615	0.0136392	4.62388	2.2091	up
Lmmn003398	C23H22O12	Kaempferol-3-O-(6''-acetyl)glucoside	Flavonoids	Flavonols	-	1	825167	9956700	1.19122	0.000737218	12.0663	3.59291	up
Lmsn004321	C22H22O13	1-O-Caffeoyl-3-O-galloyl-β-D-glucose	Tannins	Tannin	-	1	1400500	5.30207e+06	1.148	0.00596821	3.78584	1.92061	up
Lmsn004322	C24H24O12	1,6-Di-O-caffeoyl-β-D-glucose	Tannins	Tannin	-	1	3585700	8.40343e+06	1.17023	0.000480834	2.3436	1.22872	up
Hmln002199	C23H22O13	Quercetin-3-O-(6''-acetyl)galactoside	Flavonoids	Flavonols	-	1	102133	1168260	1.18062	0.0383228	11.4386	3.51584	up
Lmmp003817	C24H22O14	Kaempferol-3-O-(6''-malonyl)glucoside*	Flavonoids	Flavonols	-	1	2.87147e+06	2.12113e+07	1.19092	0.00596603	7.38693	2.88498	up
Lmdp004892	C24H22O14	Kaempferol-3-O-(6''-malonyl)galactoside*	Flavonoids	Flavonols	-	1	2522000	2.19367e+07	1.19226	0.00223366	8.69812	3.1207	up
pmb0686	C24H24O14	Eriodictyol-7-O-(6''-malonyl)glucoside	Flavonoids	Dihydroflavone	-	3	2564.77	24929.7	1.18179	0.0259859	9.72005	3.28096	up
Hmln002189	C24H22O15	Quercetin-3-O-(6''-malonyl)galactoside	Flavonoids	Flavonols	-	1	206290	2.42163e+06	1.19304	0.00793517	11.739	3.55323	up
pmp000589	C24H22O15	Quercetin-7-O-(6''-malonyl)glucoside	Flavonoids	Flavonols	-	1	258763	3.38237e+06	1.18443	0.0126241	13.0713	3.70833	up
HJAP064	C25H24O15	Isorhamnetin-3-O-(6''-malonylglucoside)*	Flavonoids	Flavonols	-	1	8823.73	69596	1.14408	0.000903742	7.88736	2.97954	up
Zmhp005139	C25H24O15	Tamarixetin-3-O-(6''-malonyl)glucoside	Flavonoids	Flavonols	-	3	7626.67	67456	1.184	0.0308271	8.84476	3.14482	up
Hmcp001858	C26H28O14	Kaempferol-3-O-arabinoside-7-O-rhamnoside	Flavonoids	Flavonols	-	1	421163	2067700	1.14484	0.0112133	4.9095	2.29558	up
Zmjp003463	C26H28O14	"Vitexin-2""-O-xyloside"	Flavonoids	Flavonoid carbonoside	-	2	81966.7	384863	1.12223	0.00346628	4.69536	2.23124	up
Lmnp102580	C26H28O14	Apigenin-6-C-(2''-xylosyl)glucoside	Flavonoids	Flavonoid carbonoside	-	2	73690	375263	1.13518	0.000453027	5.09246	2.34836	up
Lmmp003306	C25H26O15	Quercetin-3-O-xylosyl(1→2)arabinoside	Flavonoids	Flavonols	-	1	7228.23	333733	1.19132	0.0185251	46.1708	5.52891	up
pme0436	C30H26O12	Procyanidin B3*	Tannins	Proanthocyanidins	23567-23-9	1	102654	331160	1.1894	0.000190777	3.22599	1.68974	up
pme3227	C27H30O14	Vitexin-2''-O-rhamnoside	Flavonoids	Flavonoid carbonoside	64820-99-1	3	67623	1.33283e+06	1.1795	0.0167578	19.7098	4.30084	up
Lmyp004963	C27H30O14	Apigenin-6-C-(2''-rhamnosyl)glucoside	Flavonoids	Flavonoid carbonoside	-	2	56329	215113	1.14084	0.0550636	3.81887	1.93315	up
Hmcp001769	C26H28O15	Quercetin-3-O-rhamnosyl(1→2)arabinoside	Flavonoids	Flavonols	-	1	135584	741093	1.16295	0.000652051	5.46594	2.45047	up
Hmcp001829	C27H30O15	Quercetin-3,7-Di-O-rhamnoside	Flavonoids	Flavonols	28638-13-3	3	41569.7	278073	1.17474	0.0200604	6.68933	2.74186	up
Lmlp002990	C27H30O15	Isosaponarin(Isovitexin-4'-O-glucoside)	Flavonoids	Flavonoid carbonoside	19416-87-6	3	3948.6	16086.3	1.11375	0.0787305	4.07392	2.02642	up
MWSslk146	C27H30O15	4'-O-Glucosylvitexin	Flavonoids	Flavonoid carbonoside	38950-94-6	3	213850	607150	1.16207	0.00190692	2.83914	1.50545	up
mws1073	C27H30O15	Apigenin-6,8-di-C-glucoside (Vicenin-2)	Flavonoids	Flavonoid carbonoside	23666-13-9	3	13677	287293	1.19428	0.00663173	21.0056	4.3927	up
Lmjp002596	C26H28O16	Quercetin-3-O-sambubioside*	Flavonoids	Flavonols	83048-35-5	1	205587	2423000	1.19538	0.00280831	11.7858	3.55898	up
Lmln001951	C26H28O16	Quercetin-3-O-(6''-O-arabinosyl)glucoside	Flavonoids	Flavonols	-	3	16879.7	136665	1.15462	0.0587321	8.09645	3.01729	up
Lmyn005006	C30H28O13	"Eriodictyol-7-O-(6""-O-p-coumaroyl)glucoside"	Flavonoids	Dihydroflavone	-	3	7856.83	23234.3	1.17195	0.000530544	2.95721	1.56424	up
Lmyp003500	C28H24O15	Kaempferol-3-O-(2''-galloyl)galactoside	Flavonoids	Flavonols	-	1	17264.7	39791.3	1.0251	0.0279414	2.30478	1.20463	up
Hmgp002121	C31H28O13	Hispidulin-7-O-(6''-O-p-Coumaroyl)Glucoside	Flavonoids	Flavonoid	-	3	6162.27	14336.7	1.08245	0.0473245	2.32652	1.21818	up
pmb0665	C27H30O16	Orientin-7-O-glucoside	Flavonoids	Flavonoid carbonoside	-	3	515390	1772000	1.17103	0.0346877	3.43817	1.78164	up
Lmjp002461	C27H30O16	Quercetin-3-O-neohesperidoside	Flavonoids	Flavonols	117611-67-3	1	20893000	4.60807e+07	1.17448	0.00823834	2.20556	1.14114	up
Zmxp003107	C27H30O16	Luteolin-7,3'-di-O-glucoside	Flavonoids	Flavonoid	52187-80-1	1	573357	1.75487e+06	1.06498	0.00514769	3.06069	1.61386	up
pmb0711	C27H30O16	Quercetin-7-O-rutinoside	Flavonoids	Flavonols	147714-62-3	1	1.98053e+07	41267000	1.19426	0.000488616	2.08363	1.0591	up
MWSHY0067	C27H30O16	Quercetin-3-O-rutinoside (Rutin)	Flavonoids	Flavonols	153-18-4	1	19281000	4.48443e+07	1.16938	0.000349423	2.32583	1.21775	up
MWSHY0142	C28H24O16	Quercetin-3-O-(2''-galloyl)galactoside	Flavonoids	Flavonols	53209-27-1	1	11993.3	59268.3	1.17306	0.0202708	4.94177	2.30503	up
Lmzn001664	C27H28O17	Kaempferol-3-O-glucuronide-7-O-glucoside	Flavonoids	Flavonols	-	1	139103	665783	1.11248	0.00354182	4.78627	2.2589	up
HJN051	C28H32O16	Tamarixetin-3-O-rutinoside	Flavonoids	Flavonols	-	2	45004.3	94473	1.15179	0.0182229	2.0992	1.06984	up
HJAP120	C28H32O16	Rhamnetin-3-O-Rutinoside	Flavonoids	Flavonols	-	3	238773	549360	1.12836	0.0141396	2.30076	1.20211	up
Lmsp004721	C28H32O16	Tamarixetin-3-O-glucoside-7-O-rhamnoside	Flavonoids	Flavonols	-	3	284010	780350	1.12525	0.0658705	2.74761	1.45818	up
Lmmp002963	C28H32O16	6-C-Methylquercetin-3-O-rutinoside	Flavonoids	Flavonols	-	3	11216.6	208575	1.14456	0.0927454	18.5952	4.21686	up
MWSHY0135	C28H32O16	Isorhamnetin-3-O-rutinoside (Narcissin)	Flavonoids	Flavonols	604-80-8	1	247887	572457	1.18222	0.0092265	2.30935	1.20749	up
MWSHY0162	C27H30O17	Quercetin-3-O-sophoroside (Baimaside)	Flavonoids	Flavonols	18609-17-1	1	239920	901727	1.17792	0.0120034	3.75845	1.91014	up
pmp001311	C27H30O17	6-Hydroxykaempferol-7,6-O-Diglucoside	Flavonoids	Flavonols	-	1	184920	854317	1.17447	0.00588509	4.61993	2.20787	up
pmp001310	C27H30O17	6-Hydroxykaempferol-3,6-O-Diglucoside	Flavonoids	Flavonols	-	1	184843	916117	1.15934	0.000386271	4.95618	2.30923	up
Zmcp002666	C27H30O17	Quercetin3,7-diglucoside	Flavonoids	Flavonols	-	2	85501	666810	1.17058	0.00648336	7.79886	2.96326	up
pmb0645	C28H34O16	Hesperetin-6-C-glucoside-7-O-glucoside	Flavonoids	Flavonoid carbonoside	-	2	51349.7	277353	1.13526	0.0882358	5.40127	2.4333	up
pmb0618	C28H34O16	Hesperetin-8-C-glucoside-3'-O-glucoside	Flavonoids	Flavonoid carbonoside	-	3	66749	309037	1.19215	0.00056921	4.62983	2.21096	up
Hmln001836	C29H32O17	Kaempferol-3-O-(6''-Acetyl)glucosyl-(1→3)-Galactoside	Flavonoids	Flavonols	-	1	8894.17	84217	1.13826	0.0127617	9.46879	3.24318	up
Hmqp003184	C29H30O18	Luteolin-7-O-(6''-malonyl)glucoside-5-O-arabinoside	Flavonoids	Flavonoid	-	1	16401.3	1053910	1.18867	0.0113301	64.2576	6.00579	up
Lmjp002491	C35H35O17+	Cyanidin-3-O-(6''-O-p-coumaroyl-2''-O-xylosyl)glucoside	Flavonoids	Anthocyanins	-	1	771273	12310900	1.18727	0.0192028	15.9618	3.99655	up
pmb0680	C36H36O17	Vitexin-7-O-(6''-p-coumaroyl)glucoside	Flavonoids	Flavonoid carbonoside	-	2	54351.3	764227	1.17188	0.00249917	14.0609	3.81361	up
Hmmn003584	C33H40O19	Luteolin-7-O-rutinoside-5-O-rhamnoside	Flavonoids	Flavonoid	-	1	4110.7	9546.5	1.00716	0.0535391	2.32235	1.21559	up
pmb2991	C33H40O19	Apigenin-7-O-glucoside-4'-O-rutinoside	Flavonoids	Flavonoid	-	1	18813.7	219440	1.1651	0.00128319	11.6639	3.54397	up
Lmsp003881	C33H40O19	Kaempferol-3-O-rutinoside-7-O-rhamnoside	Flavonoids	Flavonols	-	1	942843	5.34113e+06	1.1894	4.94525e-06	5.66492	2.50206	up
HJAP061	C32H38O20	Quercetin-3-O-(2''-O-arabinosyl)rutinoside	Flavonoids	Flavonols	-	1	57330	828607	1.19386	0.00633879	14.4533	3.85333	up
Hmqp002870	C32H38O20	Luteolin-7-O-Sophoroside-5-O-arabinoside	Flavonoids	Flavonoid	-	2	438860	5.52287e+06	1.19222	0.00321359	12.5846	3.65358	up
Lmcp004347	C35H35O18+	Cyanidin-3-O-(6''-O-caffeoyl-2''-O-xylosyl)glucoside	Flavonoids	Anthocyanins	-	3	38131.7	241843	1.16645	0.000385937	6.34232	2.66501	up
pmb0660	C36H36O18	Isoorientin-7-O-(6''-p-coumaroyl)glucoside	Flavonoids	Flavonoid carbonoside	-	3	14736.3	139560	1.18069	0.00275203	9.47047	3.24344	up
Lnrp102163	C33H40O20	Quercetin-3-O-rutinoside-7-O-rhamnoside	Flavonoids	Flavonols	-	1	4952000	3.60203e+07	1.19433	0.0021134	7.2739	2.86273	up
pmp001105	C33H40O20	Kaempferol-3-O-neohesperidoside-7-O-glucoside	Flavonoids	Flavonols	-	1	529087	1.94967e+06	1.15065	0.0497549	3.68497	1.88165	up
Zmgp002857	C33H40O20	quercetin 3-O-α-rhamnopyranosyl (1→2)-[α-rhamnopyranosyl (1→6)]-β-glucopyranoside	Flavonoids	Flavonols	-	3	162293	1441000	1.18294	0.020216	8.87898	3.15039	up
HJAP127	C33H40O20	Quercetin-3-O-(2''-O-Rhamnosyl)rutinoside	Flavonoids	Flavonols	55696-57-6	1	4.84437e+06	35649000	1.19365	0.000308822	7.35886	2.87948	up
Lmjp003206	C32H38O21	Quercetin-3-O-Sambubioside-5-O-Glucoside	Flavonoids	Flavonols	-	1	237570	2.21593e+06	1.19403	0.000275234	9.3275	3.22149	up
HJAP128	C34H42O20	Isorhamnetin-3-O-rutinoside-7-O-rhamnoside	Flavonoids	Flavonols	-	1	137090	2413200	1.18831	0.00759693	17.603	4.13775	up
Lmdp004336	C36H36O19	Kaempferol-3-O-(6'''-Caffeoyl)glucosyl-(1→2)-Galactoside	Flavonoids	Flavonols	-	1	2616.17	14460.3	1.08583	0.0425417	5.5273	2.46657	up
Lmsp002982	C33H40O21	Quercetin-3-O-sophoroside-7-O-rhamnoside	Flavonoids	Flavonols	-	2	22117	97431.3	1.1926	0.00394434	4.40527	2.13923	up
Lmmp002755	C33H40O21	Quercetin-7-O-rutinoside-4'-O-glucoside	Flavonoids	Flavonols	-	1	57291.7	115448	1.05845	0.0511458	2.01509	1.01084	up
Lmmp002529	C33H40O21	Gossypetin-3-O-rutinoside-8-O-rhamnoside	Flavonoids	Flavonols	-	1	149057	317547	1.12901	0.00950442	2.13038	1.09111	up
Lmmp002334	C33H40O21	Quercetin-3-O-rutinoside-7-O-glucoside	Flavonoids	Flavonols	-	1	154850	1286200	1.17818	0.0199404	8.3061	3.05417	up
Zmhp002640	C33H40O21	6-Hydroxykaempferol 3-Rutinoside-6-glucoside	Flavonoids	Flavonols	-	2	132700	1.21887e+06	1.18869	0.00674602	9.18513	3.1993	up
Zmwp002963	C45H36O18	Aesculitannin B	Tannins	Tannin	-	2	25842.7	83397.7	1.0762	0.0434333	3.22713	1.69025	up
pmn001647	C45H38O18	Procyanidin C2	Tannins	Proanthocyanidins	37064-31-6	1	748393	1916200	1.11643	0.0204064	2.56042	1.35638	up
Hmmn002691	C39H52O24	Eriodictyol-5,3'-Di-O-rutinoside	Flavonoids	Dihydroflavone	-	3	3975.17	17412.7	1.13863	0.023994	4.38036	2.13105	up
Lmsp003853	C42H46O23	Quercetin-3-O-(6''-O-p-coumaroyl)sophoroside-7-O-rhamnoside	Flavonoids	Flavonols	-	2	14396	298943	1.19337	0.0111669	20.7657	4.37613	up

## Sheet: Table S5C
Supplementary Table 5C: Differentially accumulated metabolites detected in the petals of Camellia reticulata ‘Xuejiao’ (XJ) and C. reticulata ‘Tongzimian’ (TZM) upon application of partial least squares discriminant analysis (PLS-DA) with threshold of log2FC ≥1 and variable importance in projection (VIP) ≥1. The expression values are averages of the three replicates in each cultivar.
Index	Formula	Compounds	Class I	Class II	CAS	Level	XJ	TZM	VIP	p_value	Fold_Change	Log2FC	Type
Lmgp004784	C15H14O5	Apiferol	Flavonoids	Flavonoid	55167-29-8	2	125261	24309.3	1.15999	0.165521	0.194069	-2.36536	down
mws1094	C15H12O6	Aromadendrin (Dihydrokaempferol)	Flavonoids	Dihydroflavonol	480-20-6	1	76144.3	24151	1.26517	0.0173559	0.317174	-1.65665	down
MWSHY0069	C16H12O6	Hispidulin (5,7,4'-Trihydroxy-6-methoxyflavone)	Flavonoids	Flavonoid	1447-88-7	3	18846.7	7021.8	1.03096	0.192092	0.372575	-1.4244	down
Lmjp004941	C16H12O6	Rhamnocitrin (7-Methylkaempferol)	Flavonoids	Flavonols	569-92-6	3	18239	5531.4	1.05754	0.150156	0.303273	-1.72131	down
mws0855	C15H10O8	Gossypetin(3,3',4',5,7,8-Hexahydroxyflavone)	Flavonoids	Flavonols	489-35-0	2	7929.3	1804.17	1.15319	0.17638	0.227532	-2.13586	down
Zmjp008503	C18H16O6	5-Hydroxy-4',6,7-trimethoxyflavone (Salvigenin)	Flavonoids	Flavonoid	19103-54-9	3	4020.43	1976.63	1.08296	0.0587785	0.491647	-1.02431	down
pmb0580	C21H20O9	Chrysin-5-O-glucoside (Toringin)	Flavonoids	Flavonoid	1329-10-8	3	45426.7	15171.9	1.11129	0.0507997	0.333987	-1.58214	down
mws0072	C21H20O10	Apigenin-5-O-glucoside	Flavonoids	Flavonoid	28757-27-9	1	9145300	2.72657e+06	1.21442	0.00206506	0.298139	-1.74595	down
mws1434	C21H20O10	Apigenin-6-C-glucoside (Isovitexin)	Flavonoids	Flavonoid carbonoside	38953-85-4	3	287590	133487	1.21029	0.0259798	0.464156	-1.10732	down
HJN087	C21H22O10	Naringenin-4'-O-glucoside	Flavonoids	Dihydroflavone	-	2	995953	414763	1.24935	0.0357322	0.416449	-1.26379	down
Lmsp004301	C21H22O11	3',5,5',7-Tetrahydroxyflavanone-7-O-glucoside	Flavonoids	Dihydroflavone	-	2	6508500	2.50277e+06	1.0403	0.0953636	0.384538	-1.3788	down
pmn001415	C24H20O9	Catechin-(7,8-bc)-4β-(3,4-dihydroxyphenyl)-dihydro-2-(3H)-one	Flavonoids	Flavanols	-	3	129400	52514	1.27675	0.00898904	0.405827	-1.30106	down
pmn001416	C24H20O9	Catechin-(7,8-bc)-4α-(3,4-dihydroxyphenyl)-dihydro-2-(3H)-one	Flavonoids	Flavanols	-	3	1145530	376233	1.25382	0.0364375	0.328436	-1.60632	down
Lmzn001894	C21H18O12	Kaempferol-3-O-glucuronide	Flavonoids	Flavonols	22688-78-4	1	8766000	3.20533e+06	1.21834	0.058604	0.365655	-1.45144	down
Hmmp004965	C22H22O11	Diosmetin-7-O-glucoside*	Flavonoids	Dihydroflavone	20126-59-4	1	1731200	610140	1.23256	0.0211627	0.352438	-1.50456	down
Lmsn005122	C22H22O11	1-O-Galloyl-6-O-Cinnamoyl-β-D-glucose	Tannins	Tannin	115746-69-5	3	10088.8	4751.03	1.08231	0.0294985	0.470923	-1.08644	down
Lmjp003655	C22H22O11	6-C-MethylKaempferol-3-glucoside	Flavonoids	Flavonoid	-	1	1909500	581417	1.23084	0.0440688	0.304486	-1.71555	down
pmp000579	C22H22O11	Diosmetin-7-O-galactoside*	Flavonoids	Dihydroflavone	-	1	1.74117e+06	602287	1.19441	0.0466134	0.34591	-1.53153	down
MWSslk237	C22H22O11	Homoplantaginin	Flavonoids	Other Flavonoids	17680-84-1	3	1.85453e+06	594673	1.22299	0.0288106	0.320659	-1.64089	down
Lmqp006281	C23H22O11	Kaempferol-3-O-(4''-O-acetyl)rhamnoside	Flavonoids	Flavonols	-	1	130590	38353	1.26734	0.000130006	0.29369	-1.76763	down
pmb2987	C24H24O11	Acacetin-7-O-(6''-O-acetyl)glucoside	Flavonoids	Flavonoid	-	3	786587	148344	1.15013	0.0921311	0.188592	-2.40666	down
HJN078	C26H30O13	Pinocembrin-7-O-(2''-O-arabinosyl)glucoside	Flavonoids	Dihydroflavone	-	2	110019	3753.2	1.27445	0.0260801	0.0341141	-4.87349	down
mws1292	C26H28O14	Isoschaftoside	Flavonoids	Flavonoid carbonoside	52012-29-0	2	139040	50437.3	1.19282	0.0675511	0.362754	-1.46294	down
Lmtp002474	C26H28O14	Apigenin-6-C-(2''-glucosyl)arabinoside	Flavonoids	Flavonoid carbonoside	-	3	213847	73968.3	1.14541	0.107356	0.345894	-1.5316	down
Lmtp002642	C26H28O14	Apigenin-8-C-(2''-glucosyl)arabinoside	Flavonoids	Flavonoid carbonoside	-	3	81542.3	37317.7	1.01996	0.0487797	0.457648	-1.12769	down
Lmmp003306	C25H26O15	Quercetin-3-O-xylosyl(1→2)arabinoside	Flavonoids	Flavonols	-	1	779817	333733	1.11286	0.0861519	0.427964	-1.22444	down
Lmfp005436	C27H22O15	Quercetin-3-O-(2''-Galloyl)Arabinoside	Flavonoids	Flavonols	-	1	14690.7	6054.37	1.13022	0.0348561	0.412123	-1.27885	down
MWSHY0161	C30H26O13	Kaempferol-3-O-(6''-p-Coumaroyl)glucoside (Tiliroside)	Flavonoids	Flavonols	20316-62-5	1	1.07427e+06	106479	1.13756	0.228728	0.0991169	-3.33472	down
Lmyp004407	C30H26O13	Kaempferol-3-O-(2''-p-Coumaroyl)galactoside	Flavonoids	Flavonols	-	1	1095590	119426	1.15189	0.225371	0.109006	-3.19752	down
Lmyp004318	C30H26O13	Kaempferol-3-O-(6''-p-Coumaroyl)galactoside	Flavonoids	Flavonols	-	1	1.06686e+06	113848	1.12024	0.24969	0.106714	-3.22818	down
Lmln001951	C26H28O16	Quercetin-3-O-(6''-O-arabinosyl)glucoside	Flavonoids	Flavonols	-	3	971383	136665	1.22881	0.0791726	0.140691	-2.82939	down
MWSHY0092	C27H32O15	Eriodictyol-7-O-Rutinoside (Eriocitrin)	Flavonoids	Dihydroflavone	13463-28-0	2	283980	103337	1.0124	0.23727	0.363887	-1.45844	down
Lmdp004267	C30H26O14	Quercetin-3-O-(6''-p-Coumaroyl)glucoside	Flavonoids	Flavonols	-	1	132606	19372.7	1.21721	0.113039	0.146092	-2.77505	down
Lmyp004052	C30H26O14	Quercetin-3-O-(6''-p-Coumaroyl)galactoside	Flavonoids	Flavonols	-	1	130113	27065.3	1.21137	0.109889	0.208014	-2.26525	down
Xmyp005599	C27H30O16	Kaempferol-3-O-galactoside-4'-O-glucoside	Flavonoids	Flavonols	-	1	183407	65809.3	1.1304	0.0701863	0.358816	-1.47868	down
MWSHY0019	C28H34O15	Hesperetin-7-O-neohesperidoside(Neohesperidin)	Flavonoids	Dihydroflavone	13241-33-3	2	466987	33096.3	1.24474	0.0679578	0.0708721	-3.81864	down
Lmcp003751	C28H31O16+	"Cyanidin-3-O-(6""-O-acetyl-2""-O-xylosyl)glucoside"	Flavonoids	Anthocyanins	-	3	277067	9	1.29436	0.068389	3.24832e-05	-14.9099	down
Hmcp005575	C27H30O17	Quercetin-5,4'-di-O-glucoside	Flavonoids	Flavonols	-	2	277690	53761.3	1.11971	0.182893	0.193602	-2.36883	down
pmb0578	C32H30O15	Luteolin-7-O-(6''-sinapoyl)glucoside	Flavonoids	Flavonoid	-	1	12699.7	5325.67	1.14559	0.00673483	0.419355	-1.25376	down
Lmjp002491	C35H35O17+	Cyanidin-3-O-(6''-O-p-coumaroyl-2''-O-xylosyl)glucoside	Flavonoids	Anthocyanins	-	1	28742000	12310900	1.13219	0.0981309	0.428324	-1.22322	down
Lmcp004347	C35H35O18+	Cyanidin-3-O-(6''-O-caffeoyl-2''-O-xylosyl)glucoside	Flavonoids	Anthocyanins	-	3	3406100	241843	1.27246	0.0449669	0.071003	-3.81598	down
Lmmp004360	C44H44O27	Tricin-7-O-[glucuronyl(1→3)]-[(2''-O-p-Coumaroyl)glucuronyl](2→1)glucuronide	Flavonoids	Flavonoid	-	3	31674	8848.17	1.24912	0.0331144	0.279351	-1.83985	down
Lmgp004167	C15H14O6	3',4,4',5,7-Pentahydroxyflavan (Luteoforol)	Flavonoids	Flavanols	13392-26-2	1	1.40246e+06	3032800	1.01635	0.0670969	2.16248	1.11269	up
Lmdp003808	C16H12O7	Azaleatin (5-O-Methylquercetin)	Flavonoids	Flavonols	529-51-1	2	12523.3	93091	1.25877	0.0654524	7.4334	2.89402	up
Lmfn000604	C13H16O10	6-O-Galloyl-D-glucose*	Tannins	Tannin	13186-19-1	2	4.57237e+06	3.43353e+07	1.29366	4.03784e-06	7.50931	2.90868	up
Hmcp002316	C21H20O11	Isorhamnetin-3-O-arabinoside	Flavonoids	Flavonols	-	1	335413	753267	1.16822	0.00612901	2.24579	1.16722	up
Lmpn006208	C22H22O11	8-Methoxykaempferol-7-O-rhamnoside	Flavonoids	Flavonols	-	2	62947.3	311797	1.23692	0.010056	4.95329	2.30839	up
Lmsn005754	C22H22O11	1-O-Galloyl-2-O-Cinnamoyl-β-D-glucose	Tannins	Tannin	56994-83-3	2	4315.83	18966	1.2156	0.00112208	4.39452	2.1357	up
Lmsn005333	C22H22O11	4-O-Galloyl-1-O-Cinnamoyl-β-D-glucose	Tannins	Tannin	-	2	2408.37	6453	1.10308	0.0201719	2.67941	1.42191	up
mws0056	C21H20O12	Myricetin-3-O-rhamnoside (Myricitrin)	Flavonoids	Flavonols	17912-87-7	3	8377.17	54066.3	1.26675	0.00292029	6.45401	2.6902	up
Lmzp002365	C22H24O11	Hesperetin-7-O-glucoside	Flavonoids	Dihydroflavone	31712-49-9	2	747860	2.02057e+06	1.23522	0.0236277	2.7018	1.43392	up
pme1398	C21H21O12+	Delphinidin-3-O-glucoside (Mirtillin)*	Flavonoids	Anthocyanins	50986-17-9	1	9	145603	1.29534	0.00312528	16178.1	13.9818	up
Lmcp001821	C21H21O12+	Delphinidin-3-O-galactoside*	Flavonoids	Anthocyanins	28500-00-7	1	9	158770	1.29514	0.00549955	17641.1	14.1067	up
Lmfn001344	C20H20O13	Maplexin C (2,3-Di-O-Galloyl-1,5-Anhydro-D-Glucitol)	Tannins	Tannin	-	3	11156	27374.3	1.27291	0.000615333	2.45378	1.295	up
Lmmp003783	C21H18O13	Quercetin-3-O-glucuronide	Flavonoids	Flavonols	22688-79-5	1	49344.7	135410	1.08853	0.0297346	2.74417	1.45637	up
pma6640	C22H22O12	3'-O-Methyltricetin-7-O-glucoside	Flavonoids	Flavonoid	-	3	99297.3	372617	1.13168	0.024728	3.75253	1.90787	up
pma0249	C22H22O12	3'-O-Methyltricetin-5-O-glucoside	Flavonoids	Flavonoid	-	3	14161.5	53641.3	1.0809	0.016457	3.78783	1.92137	up
Lmmp001947	C21H20O13	Gossypetin-3-O-glucoside	Flavonoids	Flavonols	-	3	20743.7	158603	1.25046	0.00153349	7.64587	2.93468	up
Lmmp003271	C21H20O13	Gossypetin-8-O-glucoside	Flavonoids	Flavonols	652-78-8	2	32177.3	73892.7	1.1329	0.0170752	2.29642	1.19939	up
Lmfp003403	C21H20O13	Quercetagetin-7-O-glucoside	Flavonoids	Flavonols	548-75-4	3	35656.7	178786	1.15834	0.0688417	5.01411	2.32599	up
Lmmn003398	C23H22O12	Kaempferol-3-O-(6''-acetyl)glucoside	Flavonoids	Flavonols	-	1	2.21403e+06	9956700	1.23882	0.00038271	4.49709	2.16899	up
Lmsn004321	C22H22O13	1-O-Caffeoyl-3-O-galloyl-β-D-glucose	Tannins	Tannin	-	1	1.39547e+06	5.30207e+06	1.27553	0.0122432	3.79949	1.92581	up
pmb3045	C23H22O13	Tricin-7-O-Glucuronide	Flavonoids	Flavonoid	-	1	5174.63	17900.3	1.21497	0.00656681	3.45925	1.79046	up
Hmln002199	C23H22O13	Quercetin-3-O-(6''-acetyl)galactoside	Flavonoids	Flavonols	-	1	243957	1168260	1.08071	0.029415	4.7888	2.25966	up
Lmsn004323	C23H24O13	1-O-Galloyl-2-O-Feruloyl-β-D-glucose	Tannins	Tannin	-	2	2892.93	33212	1.28168	0.0126194	11.4804	3.5211	up
Li512111	C24H24O13	Isorhamnetin-3-O-(6''-acetylglucoside)	Flavonoids	Flavonols	-	3	10363.4	52176.3	1.12329	0.00314793	5.03469	2.3319	up
pmb3041	C23H22O14	Tricin-7-O-saccharic acid	Flavonoids	Flavonoid	-	2	1.24245e+06	4.16803e+06	1.21729	0.00182042	3.3547	1.74618	up
Lmmp003817	C24H22O14	Kaempferol-3-O-(6''-malonyl)glucoside*	Flavonoids	Flavonols	-	1	6.75203e+06	2.12113e+07	1.23154	0.00194671	3.14147	1.65144	up
Lmdp004892	C24H22O14	Kaempferol-3-O-(6''-malonyl)galactoside*	Flavonoids	Flavonols	-	1	6711100	2.19367e+07	1.22536	0.00110317	3.26871	1.70872	up
pmb0686	C24H24O14	Eriodictyol-7-O-(6''-malonyl)glucoside	Flavonoids	Dihydroflavone	-	3	10697.4	24929.7	1.06339	0.0433431	2.33044	1.2206	up
Hmln002189	C24H22O15	Quercetin-3-O-(6''-malonyl)galactoside	Flavonoids	Flavonols	-	1	591103	2.42163e+06	1.16854	0.00397692	4.0968	2.0345	up
pmp000589	C24H22O15	Quercetin-7-O-(6''-malonyl)glucoside	Flavonoids	Flavonols	-	1	637083	3.38237e+06	1.19474	0.00528958	5.30914	2.40848	up
Zmhp005139	C25H24O15	Tamarixetin-3-O-(6''-malonyl)glucoside	Flavonoids	Flavonols	-	3	15913.7	67456	1.1476	0.0238266	4.23885	2.08367	up
pma0760	C25H24O15	3'-O-Methyltricetin-7-O-(6''-malonyl)glucoside*	Flavonoids	Flavonoid	-	1	17049.6	59675	1.12409	0.00692499	3.50008	1.80739	up
Hmcp001858	C26H28O14	Kaempferol-3-O-arabinoside-7-O-rhamnoside	Flavonoids	Flavonols	-	1	829993	2067700	1.22889	0.0187545	2.49122	1.31686	up
Zmjp003463	C26H28O14	"Vitexin-2""-O-xyloside"	Flavonoids	Flavonoid carbonoside	-	2	189163	384863	1.22627	0.0163111	2.03456	1.02471	up
Lmnp102580	C26H28O14	Apigenin-6-C-(2''-xylosyl)glucoside	Flavonoids	Flavonoid carbonoside	-	2	177357	375263	1.26097	0.000839767	2.11587	1.08125	up
Smhp004476	C26H28O14	Isovitexin-2''xyloside	Flavonoids	Flavonoid carbonoside	-	3	13143.3	27142	1.17532	0.0891136	2.06508	1.0462	up
Lmsn007789	C30H30O11	Phloretin-4'-O-(6''-Cinnamoyl)glucoside	Flavonoids	Chalcones	-	3	3071.37	9221.27	1.01534	0.0369299	3.00233	1.58608	up
Hmcp001769	C26H28O15	Quercetin-3-O-rhamnosyl(1→2)arabinoside	Flavonoids	Flavonols	-	1	236883	741093	1.23871	0.000957149	3.12852	1.64548	up
Lmmp003672	C31H28O12	8,8'-Methylenebiscatechin	Flavonoids	Flavanols	81555-08-0	3	87281.3	227300	1.2152	0.024073	2.60422	1.38085	up
HJN074	C31H28O12	Procyanidin A6	Tannins	Proanthocyanidins	-	3	11016	27262.7	1.2855	0.000195964	2.47482	1.30733	up
pmp001288	C28H32O14	Acacetin-7-O-rutinoside (Linarin)	Flavonoids	Flavonoid	480-36-4	3	9998.9	20547.3	1.07528	0.0415762	2.05496	1.03911	up
MWSHY0080	C27H30O15	Luteolin-7-O-neohesperidoside (Lonicerin)	Flavonoids	Flavonoid	25694-72-8	1	1484200	3.55017e+06	1.28367	0.0113874	2.39197	1.2582	up
pmp000593	C27H30O15	Luteolin-7-O-rutinoside*	Flavonoids	Flavonoid	3563-98-2	1	10491500	26543000	1.28602	0.00130749	2.52995	1.33911	up
MWSHY0061	C27H30O15	Kaempferol-3-O-neohesperidoside	Flavonoids	Flavonols	32602-81-6	1	1.44983e+06	3.15043e+06	1.25592	0.0332453	2.17296	1.11966	up
MWSHY0050	C27H30O15	Kaempferol-3-O-rutinoside(Nicotiflorin)	Flavonoids	Flavonols	17650-84-9	1	1201400	2.94907e+06	1.29037	0.000235668	2.45469	1.29554	up
Hmcp001829	C27H30O15	Quercetin-3,7-Di-O-rhamnoside	Flavonoids	Flavonols	28638-13-3	3	74158.3	278073	1.26953	0.0286582	3.74972	1.90678	up
mws1073	C27H30O15	Apigenin-6,8-di-C-glucoside (Vicenin-2)	Flavonoids	Flavonoid carbonoside	23666-13-9	3	63879.7	287293	1.26425	0.00455666	4.49741	2.1691	up
pmb0665	C27H30O16	Orientin-7-O-glucoside	Flavonoids	Flavonoid carbonoside	-	3	515040	1772000	1.22099	0.0233777	3.44051	1.78262	up
Lmbp002592	C27H30O16	Kaempferol-3,7-di-O-glucoside	Flavonoids	Flavonols	-	3	138547	1.55383e+06	1.26995	0.00765498	11.2152	3.48738	up
Lmjp002461	C27H30O16	Quercetin-3-O-neohesperidoside	Flavonoids	Flavonols	117611-67-3	1	16715000	4.60807e+07	1.2668	0.00313702	2.75685	1.46302	up
Lmmp003091	C27H30O16	Quercetin-3-O-(4''-O-glucosyl)rhamnoside	Flavonoids	Flavonols	59262-54-3	1	14876000	3.52313e+07	1.27418	0.00425486	2.36833	1.24387	up
Hmpp002612	C27H30O16	Luteolin-7-O-gentiobioside	Flavonoids	Flavonoid	-	1	9	1657300	1.29537	0.00430753	184144	17.4905	up
Zmxp003107	C27H30O16	Luteolin-7,3'-di-O-glucoside	Flavonoids	Flavonoid	52187-80-1	1	569983	1.75487e+06	1.21809	0.00290003	3.0788	1.62237	up
pmb0711	C27H30O16	Quercetin-7-O-rutinoside	Flavonoids	Flavonols	147714-62-3	1	1.59593e+07	41267000	1.27595	0.000279201	2.58576	1.37059	up
MWSHY0067	C27H30O16	Quercetin-3-O-rutinoside (Rutin)	Flavonoids	Flavonols	153-18-4	1	14653000	4.48443e+07	1.28137	0.000262793	3.06042	1.61373	up
pme1777	C27H31O16+	Cyanidin-3,5-O-diglucoside (Cyanin)	Flavonoids	Anthocyanins	2611-67-8	1	36218.3	111577	1.21458	0.0448837	3.08068	1.62325	up
Lmsn006905	C31H32O13	Phloretin-4'-O-(6''-Feruloyl)glucoside	Flavonoids	Chalcones	-	3	31300.3	82453.7	1.11006	0.0154219	2.63427	1.39741	up
Lmzn001664	C27H28O17	Kaempferol-3-O-glucuronide-7-O-glucoside	Flavonoids	Flavonols	-	1	223080	665783	1.25677	0.0110292	2.9845	1.57749	up
HJN051	C28H32O16	Tamarixetin-3-O-rutinoside	Flavonoids	Flavonols	-	2	18582.7	94473	1.23479	0.00327284	5.08393	2.34594	up
HJAP120	C28H32O16	Rhamnetin-3-O-Rutinoside	Flavonoids	Flavonols	-	3	80628.7	549360	1.28439	0.0109001	6.81346	2.76839	up
Zmxp002867	C28H32O16	Chrysoeriol-5,7-di-O-glucoside	Flavonoids	Flavonoid	-	3	5332.73	26528.7	1.26631	0.00740659	4.97468	2.31461	up
Lmsp004721	C28H32O16	Tamarixetin-3-O-glucoside-7-O-rhamnoside	Flavonoids	Flavonols	-	3	138024	780350	1.25369	0.039649	5.65374	2.49921	up
MWSHY0064	C28H32O16	Isorhamnetin-3-O-neohespeidoside	Flavonoids	Flavonols	55033-90-4	1	116415	499707	1.25909	0.000291049	4.29246	2.1018	up
Lmmp002963	C28H32O16	6-C-Methylquercetin-3-O-rutinoside	Flavonoids	Flavonols	-	3	36517.3	208575	1.09822	0.112695	5.71166	2.51391	up
MWSHY0135	C28H32O16	Isorhamnetin-3-O-rutinoside (Narcissin)	Flavonoids	Flavonols	604-80-8	1	134842	572457	1.23225	0.000758935	4.2454	2.0859	up
MWSHY0162	C27H30O17	Quercetin-3-O-sophoroside (Baimaside)	Flavonoids	Flavonols	18609-17-1	1	273360	901727	1.24373	0.0062116	3.29868	1.72189	up
pmp001310	C27H30O17	6-Hydroxykaempferol-3,6-O-Diglucoside	Flavonoids	Flavonols	-	1	312817	916117	1.15116	0.0073075	2.92861	1.55021	up
mws1045	C27H30O17	Myricetin-3-O-rutinoside	Flavonoids	Flavonols	-	3	12169	186057	1.26753	0.0157342	15.2894	3.93446	up
pmb0645	C28H34O16	Hesperetin-6-C-glucoside-7-O-glucoside	Flavonoids	Flavonoid carbonoside	-	2	47533	277353	1.21891	0.0850046	5.83496	2.54472	up
pmf0116	C27H31O17+	Delphinidin-3,5-di-O-glucoside	Flavonoids	Anthocyanins	17670-06-3	1	11328.3	37114.3	1.24204	0.00932802	3.27625	1.71205	up
Hmqp003184	C29H30O18	Luteolin-7-O-(6''-malonyl)glucoside-5-O-arabinoside	Flavonoids	Flavonoid	-	1	72159.7	1053910	1.25601	0.0103769	14.6053	3.86842	up
pmb0680	C36H36O17	Vitexin-7-O-(6''-p-coumaroyl)glucoside	Flavonoids	Flavonoid carbonoside	-	2	134103	764227	1.27613	0.00249635	5.6988	2.51066	up
Zmlp003063	C33H40O19	Luteolin-7-O-(2''-O-rhamnosyl)rutinoside	Flavonoids	Flavonoid	-	1	577160	2.16127e+06	1.26448	0.000308986	3.74466	1.90483	up
pmb2991	C33H40O19	Apigenin-7-O-glucoside-4'-O-rutinoside	Flavonoids	Flavonoid	-	1	31990.3	219440	1.25698	0.00067036	6.85957	2.77812	up
Lmsp003881	C33H40O19	Kaempferol-3-O-rutinoside-7-O-rhamnoside	Flavonoids	Flavonols	-	1	586150	5.34113e+06	1.2813	3.08114e-06	9.11223	3.1878	up
mws1035	C33H40O19	Kaempferol-3-O-robinoside-7-O-rhamnoside (Robinin)	Flavonoids	Flavonols	301-19-9	1	410943	1935500	1.29017	0.00032315	4.7099	2.23569	up
Hmqp002870	C32H38O20	Luteolin-7-O-Sophoroside-5-O-arabinoside	Flavonoids	Flavonoid	-	2	1.02356e+06	5.52287e+06	1.28037	0.0015403	5.39576	2.43183	up
pmb0660	C36H36O18	Isoorientin-7-O-(6''-p-coumaroyl)glucoside	Flavonoids	Flavonoid carbonoside	-	3	50234	139560	1.246	0.00167566	2.7782	1.47415	up
Lnrp102163	C33H40O20	Quercetin-3-O-rutinoside-7-O-rhamnoside	Flavonoids	Flavonols	-	1	1.45217e+07	3.60203e+07	1.26196	0.000655019	2.48045	1.3106	up
pmp001105	C33H40O20	Kaempferol-3-O-neohesperidoside-7-O-glucoside	Flavonoids	Flavonols	-	1	28526	1.94967e+06	1.29239	0.0296288	68.347	6.09481	up
Zmgp002857	C33H40O20	quercetin 3-O-α-rhamnopyranosyl (1→2)-[α-rhamnopyranosyl (1→6)]-β-glucopyranoside	Flavonoids	Flavonols	-	3	300800	1441000	1.17543	0.0113085	4.79056	2.26019	up
HJAP127	C33H40O20	Quercetin-3-O-(2''-O-Rhamnosyl)rutinoside	Flavonoids	Flavonols	55696-57-6	1	1.24847e+07	35649000	1.27173	0.000234728	2.85542	1.5137	up
Lmjp003206	C32H38O21	Quercetin-3-O-Sambubioside-5-O-Glucoside	Flavonoids	Flavonols	-	1	624720	2.21593e+06	1.28916	3.41664e-05	3.54708	1.82663	up
pmb0672	C37H38O18	Isovitexin-7-O-(6''-feruloyl)glucoside	Flavonoids	Flavonoid carbonoside	-	3	6372.67	35934.7	1.15876	0.00389301	5.63887	2.49541	up
HJAP128	C34H42O20	Isorhamnetin-3-O-rutinoside-7-O-rhamnoside	Flavonoids	Flavonols	-	1	373880	2413200	1.28972	0.00957896	6.45448	2.6903	up
Lmsp002982	C33H40O21	Quercetin-3-O-sophoroside-7-O-rhamnoside	Flavonoids	Flavonols	-	2	18931.7	97431.3	1.28839	0.00291721	5.14647	2.36358	up
Lmmp002755	C33H40O21	Quercetin-7-O-rutinoside-4'-O-glucoside	Flavonoids	Flavonols	-	1	32898.7	115448	1.24444	0.0281639	3.50919	1.81114	up
Lmmp002529	C33H40O21	Gossypetin-3-O-rutinoside-8-O-rhamnoside	Flavonoids	Flavonols	-	1	71358	317547	1.28241	2.45705e-05	4.45005	2.15382	up
Lmmp002334	C33H40O21	Quercetin-3-O-rutinoside-7-O-glucoside	Flavonoids	Flavonols	-	1	14815.4	1286200	1.28283	0.0170336	86.8151	6.43987	up
Zmhp002640	C33H40O21	6-Hydroxykaempferol 3-Rutinoside-6-glucoside	Flavonoids	Flavonols	-	2	15139.7	1.21887e+06	1.29012	0.00626763	80.5082	6.33106	up
Lmsp003853	C42H46O23	Quercetin-3-O-(6''-O-p-coumaroyl)sophoroside-7-O-rhamnoside	Flavonoids	Flavonols	-	2	45467.3	298943	1.28488	0.013526	6.5749	2.71697	up
